# Supplementary material for: Brain Age Prediction: A Comparison between Machine Learning Models Using Brain Morphometric Data
Source: MDPI journal article supplement (doi:10.3390/s22208077), 2022-10-21
Supplement: s1 [file s1]

# Brain Age Prediction: A Comparison Between Machine Learning Models Using Brain Morphometric Data

## Supplementary Materials

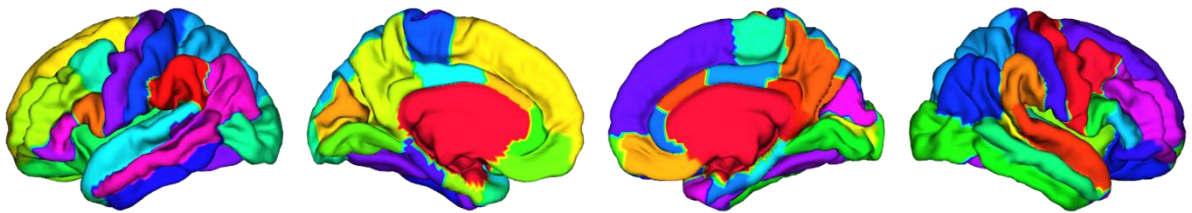

Cortical regions

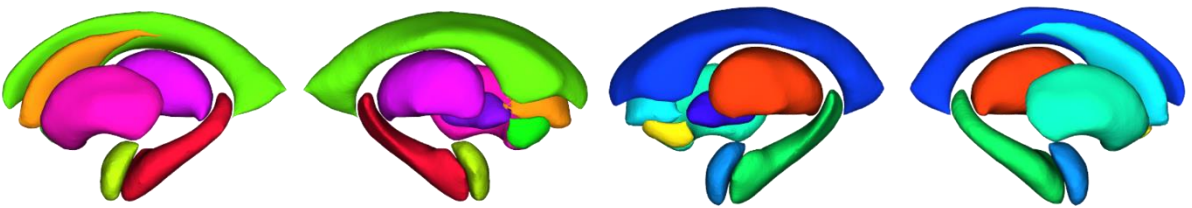

Subcortical regions

**Supplementary Figure S1.** Definition of the Desikan-Killiany atlas.

**Supplementary Table S1.** List of the anatomical regions of the Desikan-Killiany atlas

| Cortical regions |                             |            |                                   |           |
|------------------|-----------------------------|------------|-----------------------------------|-----------|
| Label number     | Label Name                  | Hemisphere | Name                              | Lobe      |
| 1                | lh_bankssts                 | L          | Banks of superior temporal sulcus |           |
| 2                | lh_caudalanteriorcingulate  | L          | Caudal anterior cingulate cortex  | Frontal   |
| 3                | lh_caudalmiddlefrontal      | L          | Caudal middle frontal gyrus       | Frontal   |
| 4                | lh_cuneus                   | L          | Cuneus                            | Occipital |
| 5                | lh_entorhinal               | L          | Entorhinal cortex                 | Temporal  |
| 6                | lh_fusiform                 | L          | Fusiform gyrus                    | Temporal  |
| 7                | lh_inferiorparietal         | L          | Inferior parietal lobule          | Parietal  |
| 8                | lh_inferiortemporal         | L          | Inferior temporal gyrus           | Temporal  |
| 9                | lh_lateraloccipital         | L          | Lateral occipital gyrus           | Occipital |
| 10               | lh_lateralorbitofrontal     | L          | Lateral orbitofrontal gyrus       | Frontal   |
| 11               | lh_lingual                  | L          | Lingual gyrus                     | Occipital |
| 12               | lh_medialorbitofrontal      | L          | Medial orbitofrontal gyrus        | Frontal   |
| 13               | lh_middletemporal           | L          | Middle temporal gyrus             | Temporal  |
| 14               | lh_parahippocampal          | L          | Parahippocampal gyrus             | Temporal  |
| 15               | lh_paracentral              | L          | Paracentral gyrus                 | Frontal   |
| 16               | lh_parsopercularis          | L          | Pars opercularis                  | Frontal   |
| 17               | lh_parsorbitalis            | L          | Pars orbitalis                    | Frontal   |
| 18               | lh_parstriangularis         | L          | Pars triangularis                 | Frontal   |
| 19               | lh_pericalcarine            | L          | Pericalcarine gyrus               | Occipital |
| 20               | lh_postcentral              | L          | Postcentral gyrus                 | Parietal  |
| 21               | lh_posteriorcingulate       | L          | Posterior cingulate cortex        | Parietal  |
| 22               | lh_precentral               | L          | Precentral gyrus                  | Frontal   |
| 23               | lh_precuneus                | L          | Precuneus                         | Parietal  |
| 24               | lh_rostralanteriorcingulate | L          | Rostral anterior cingulate cortex | Frontal   |
| 25               | lh_rostralmiddlefrontal     | L          | Rostral middle frontal gyrus      | Frontal   |
| 26               | lh_superiorfrontal          | L          | Superior frontal gyrus            | Frontal   |
| 27               | lh_superiorparietal         | L          | Superior parietal lobule          | Parietal  |
| 28               | lh_superiortemporal         | L          | Superior temporal gyrus           | Temporal  |
| 29               | lh_supramarginal            | L          | Supramarginal gyrus               | Parietal  |
| 30               | lh_frontalpole              | L          | Frontal pole                      | Frontal   |
| 31               | lh_temporalpole             | L          | Temporal pole                     | Temporal  |
| 32               | lh_transversetemporal       | L          | Transverse temporal gyrus         | Temporal  |
| 33               | lh_insula                   | L          | Insula                            |           |
| 34               | lh_isthmuscingulate         | L          | Isthmus cingulate                 |           |
| 35               | rh_bankssts                 | R          | Banks of superior temporal sulcus |           |
| 36               | rh_caudalanteriorcingulate  | R          | Caudal anterior cingulate cortex  | Frontal   |
| 37               | rh_caudalmiddlefrontal      | R          | Caudal middle frontal gyrus       | Frontal   |
| 38               | rh_cuneus                   | R          | Cuneus                            | Occipital |

|                            |                             |   |                                   |           |
|----------------------------|-----------------------------|---|-----------------------------------|-----------|
| 39                         | rh_entorhinal               | R | Entorhinal cortex                 | Temporal  |
| 40                         | rh_fusiform                 | R | Fusiform gyrus                    | Temporal  |
| 41                         | rh_inferiorparietal         | R | Inferior parietal lobule          | Parietal  |
| 42                         | rh_inferiortemporal         | R | Inferior temporal gyrus           | Temporal  |
| 43                         | rh_lateraloccipital         | R | Lateral occipital gyrus           | Occipital |
| 44                         | rh_lateralorbitofrontal     | R | Lateral orbitofrontal gyrus       | Frontal   |
| 45                         | rh_lingual                  | R | Lingual gyrus                     | Occipital |
| 46                         | rh_medialorbitofrontal      | R | Medial orbitofrontal gyrus        | Frontal   |
| 47                         | rh_middletemporal           | R | Middle temporal gyrus             | Temporal  |
| 48                         | rh_parahippocampal          | R | Parahippocampal gyrus             | Temporal  |
| 49                         | rh_paracentral              | R | Paracentral gyrus                 | Frontal   |
| 50                         | rh_parsopercularis          | R | Pars opercularis                  | Frontal   |
| 51                         | rh_parsorbitalis            | R | Pars orbitalis                    | Frontal   |
| 52                         | rh_parstriangularis         | R | Pars triangularis                 | Frontal   |
| 53                         | rh_pericalcarine            | R | Pericalcarine gyrus               | Occipital |
| 54                         | rh_postcentral              | R | Postcentral gyrus                 | Parietal  |
| 55                         | rh_posteriorcingulate       | R | Posterior cingulate cortex        | Parietal  |
| 56                         | rh_precentral               | R | Precentral gyrus                  | Frontal   |
| 57                         | rh_precuneus                | R | Precuneus                         | Parietal  |
| 58                         | rh_rostralanteriorcingulate | R | Rostral anterior cingulate cortex | Frontal   |
| 59                         | rh_rostralmiddlefrontal     | R | Rostral middle frontal gyrus      | Frontal   |
| 60                         | rh_superiorfrontal          | R | Superior frontal gyrus            | Frontal   |
| 61                         | rh_superiorparietal         | R | Superior parietal lobule          | Parietal  |
| 62                         | rh_superiortemporal         | R | Superior temporal gyrus           | Temporal  |
| 63                         | rh_supramarginal            | R | Supramarginal gyrus               | Parietal  |
| 64                         | rh_frontalpole              | R | Frontal pole                      | Frontal   |
| 65                         | rh_temporalpole             | R | Temporal pole                     | Temporal  |
| 66                         | rh_transversetemporal       | R | Transverse temporal gyrus         | Temporal  |
| 67                         | rh_insula                   | R | Insula                            |           |
| 68                         | rh_isthmuscingulate         | R | Isthmus cingulate                 |           |
| <b>Subcortical regions</b> |                             |   |                                   |           |
| 69                         | lh_thalamus                 | L | Thalamus                          |           |
| 70                         | lh_hippocampus              | L | Hippocampus                       |           |
| 71                         | lh_caudate                  | L | Caudate nucleus                   |           |
| 72                         | lh_accumbens                | L | Nucleus Accumbens                 |           |
| 73                         | lh_pallidum                 | L | Pallidum                          |           |
| 74                         | lh_putamen                  | L | Putamen                           |           |
| 75                         | lh_amygdala                 | L | Amygdala                          |           |
| 76                         | lh_lateral_ventricle        | L | Lateral ventricles                |           |
| 77                         | rh_thalamus                 | R | Thalamus                          |           |
| 78                         | rh_hippocampus              | R | Hippocampus                       |           |
| 79                         | rh_caudate                  | R | Caudate nucleus                   |           |
| 80                         | rh_accumbens                | R | Nucleus Accumbens                 |           |
| 81                         | rh_pallidum                 | R | Pallidum                          |           |

|    |                      |   |                    |  |
|----|----------------------|---|--------------------|--|
| 82 | rh_putamen           | R | Putamen            |  |
| 83 | rh_amygdala          | R | Amygdala           |  |
| 84 | rh_lateral_ventricle | R | Lateral ventricles |  |

**Supplementary Table S2.** Brain morphometric characteristics for the three cohorts

| Label Name                  | HCP                             | Cam-CAN                         | IXI                             |
|-----------------------------|---------------------------------|---------------------------------|---------------------------------|
|                             | Mean $\pm$ SD<br>(min, max)     | Mean $\pm$ SD<br>(min, max)     | Mean $\pm$ SD<br>(min, max)     |
| <b>Cortical thickness</b>   |                                 |                                 |                                 |
| lh_bankssts                 | 2.68 $\pm$ 0.14<br>(1.82, 3.04) | 2.57 $\pm$ 0.17<br>(1.31, 3.05) | 2.42 $\pm$ 0.19<br>(1.4, 2.9)   |
| lh_caudalanteriorcingulate  | 2.69 $\pm$ 0.17<br>(2.0, 3.25)  | 2.66 $\pm$ 0.24<br>(1.5, 3.42)  | 2.41 $\pm$ 0.2<br>(1.63, 2.98)  |
| lh_caudalmiddlefrontal      | 2.73 $\pm$ 0.12<br>(1.83, 3.15) | 2.63 $\pm$ 0.17<br>(1.66, 3.12) | 2.5 $\pm$ 0.14<br>(1.79, 2.87)  |
| lh_cuneus                   | 2.08 $\pm$ 0.11<br>(1.38, 2.45) | 1.89 $\pm$ 0.16<br>(1.15, 2.44) | 1.71 $\pm$ 0.15<br>(1.22, 2.23) |
| lh_entorhinal               | 3.3 $\pm$ 0.24<br>(2.28, 4.32)  | 3.44 $\pm$ 0.28<br>(2.08, 4.2)  | 3.16 $\pm$ 0.27<br>(1.95, 3.98) |
| lh_fusiform                 | 2.88 $\pm$ 0.12<br>(1.85, 3.29) | 2.8 $\pm$ 0.14<br>(1.51, 3.2)   | 2.55 $\pm$ 0.17<br>(1.61, 2.92) |
| lh_inferiorparietal         | 2.58 $\pm$ 0.11<br>(1.83, 2.97) | 2.51 $\pm$ 0.15<br>(1.35, 2.95) | 2.36 $\pm$ 0.13<br>(1.65, 2.66) |
| lh_inferiortemporal         | 2.94 $\pm$ 0.13<br>(2.03, 3.31) | 2.89 $\pm$ 0.14<br>(1.9, 3.29)  | 2.7 $\pm$ 0.15<br>(2.06, 3.19)  |
| lh_lateraloccipital         | 2.29 $\pm$ 0.11<br>(1.53, 2.56) | 2.26 $\pm$ 0.13<br>(1.63, 2.66) | 2.04 $\pm$ 0.12<br>(1.46, 2.41) |
| lh_lateralorbitofrontal     | 2.81 $\pm$ 0.12<br>(1.89, 3.33) | 2.7 $\pm$ 0.14<br>(1.7, 3.15)   | 2.62 $\pm$ 0.18<br>(1.81, 3.3)  |
| lh_lingual                  | 2.17 $\pm$ 0.11<br>(1.36, 2.49) | 2.03 $\pm$ 0.14<br>(1.39, 2.49) | 1.78 $\pm$ 0.13<br>(1.36, 2.3)  |
| lh_medialorbitofrontal      | 2.57 $\pm$ 0.15<br>(1.8, 3.18)  | 2.46 $\pm$ 0.14<br>(1.58, 3.06) | 2.34 $\pm$ 0.19<br>(1.75, 3.05) |
| lh_middletemporal           | 2.98 $\pm$ 0.13<br>(2.05, 3.36) | 2.92 $\pm$ 0.16<br>(1.77, 3.38) | 2.73 $\pm$ 0.15<br>(1.94, 3.11) |
| lh_parahippocampal          | 2.72 $\pm$ 0.26<br>(1.78, 3.48) | 2.84 $\pm$ 0.29<br>(1.73, 3.58) | 2.65 $\pm$ 0.27<br>(1.75, 3.55) |
| lh_paracentral              | 2.55 $\pm$ 0.13<br>(1.66, 3.01) | 2.44 $\pm$ 0.17<br>(1.18, 2.9)  | 2.24 $\pm$ 0.19<br>(1.36, 2.76) |
| lh_parsopercularis          | 2.78 $\pm$ 0.12<br>(1.9, 3.25)  | 2.62 $\pm$ 0.16<br>(1.54, 3.17) | 2.52 $\pm$ 0.16<br>(1.65, 2.96) |
| lh_parsorbitalis            | 2.78 $\pm$ 0.15<br>(1.9, 3.2)   | 2.74 $\pm$ 0.19<br>(2.12, 3.24) | 2.67 $\pm$ 0.21<br>(1.61, 3.45) |
| lh_parstriangularis         | 2.63 $\pm$ 0.13<br>(1.78, 3.17) | 2.48 $\pm$ 0.16<br>(1.82, 3.0)  | 2.4 $\pm$ 0.16<br>(1.46, 2.95)  |
| lh_pericalcarine            | 2.0 $\pm$ 0.12<br>(1.37, 2.45)  | 1.63 $\pm$ 0.14<br>(1.3, 2.13)  | 1.43 $\pm$ 0.13<br>(1.01, 2.02) |
| lh_postcentral              | 2.21 $\pm$ 0.1<br>(1.56, 2.55)  | 2.14 $\pm$ 0.15<br>(1.59, 2.75) | 2.02 $\pm$ 0.13<br>(1.5, 2.48)  |
| lh_posteriorcingulate       | 2.56 $\pm$ 0.13<br>(1.43, 2.92) | 2.47 $\pm$ 0.16<br>(1.42, 2.93) | 2.34 $\pm$ 0.17<br>(1.51, 2.88) |
| lh_precentral               | 2.73 $\pm$ 0.11<br>(1.78, 3.13) | 2.63 $\pm$ 0.19<br>(1.77, 3.12) | 2.43 $\pm$ 0.19<br>(1.49, 2.87) |
| lh_precuneus                | 2.52 $\pm$ 0.11<br>(1.74, 2.82) | 2.42 $\pm$ 0.15<br>(1.16, 2.87) | 2.26 $\pm$ 0.16<br>(1.34, 2.71) |
| lh_rostralanteriorcingulate | 3.03 $\pm$ 0.18<br>(2.19, 3.63) | 2.82 $\pm$ 0.2<br>(1.46, 3.55)  | 2.64 $\pm$ 0.2<br>(1.62, 3.35)  |
| lh_rostralmiddlefrontal     | 2.57 $\pm$ 0.12<br>(1.9, 3.01)  | 2.43 $\pm$ 0.13<br>(1.71, 2.81) | 2.35 $\pm$ 0.12<br>(1.77, 2.63) |

|                            |                             |                             |                             |
|----------------------------|-----------------------------|-----------------------------|-----------------------------|
| lh_superiorfrontal         | 2.84 ± 0.13<br>(2.05, 3.26) | 2.74 ± 0.17<br>(1.65, 3.19) | 2.68 ± 0.15<br>(1.89, 3.12) |
| lh_superiorparietal        | 2.29 ± 0.1<br>(1.62, 2.55)  | 2.27 ± 0.14<br>(1.68, 2.7)  | 2.12 ± 0.11<br>(1.65, 2.43) |
| lh_superiortemporal        | 2.89 ± 0.13<br>(2.08, 3.3)  | 2.82 ± 0.18<br>(1.73, 3.41) | 2.67 ± 0.16<br>(1.8, 3.05)  |
| lh_supramarginal           | 2.65 ± 0.11<br>(1.89, 3.03) | 2.6 ± 0.16<br>(1.51, 3.09)  | 2.47 ± 0.14<br>(1.79, 2.81) |
| lh_frontalpole             | 2.84 ± 0.2<br>(1.94, 3.65)  | 2.81 ± 0.23<br>(2.12, 3.82) | 2.73 ± 0.23<br>(1.76, 3.42) |
| lh_temporalpole            | 3.42 ± 0.27<br>(2.56, 4.26) | 3.63 ± 0.28<br>(2.16, 4.37) | 3.57 ± 0.31<br>(2.09, 4.26) |
| lh_transversetemporal      | 2.66 ± 0.17<br>(1.6, 3.17)  | 2.45 ± 0.24<br>(1.3, 3.18)  | 2.24 ± 0.24<br>(1.3, 2.84)  |
| lh_insula                  | 3.06 ± 0.15<br>(2.13, 3.46) | 2.95 ± 0.18<br>(1.64, 3.37) | 2.84 ± 0.19<br>(1.56, 3.41) |
| lh_isthmuscingulate        | 2.28 ± 0.3<br>(0.95, 2.8)   | 2.34 ± 0.19<br>(1.72, 2.95) | 2.23 ± 0.19<br>(1.61, 2.94) |
| rh_bankssts                | 2.79 ± 0.14<br>(2.24, 3.25) | 2.65 ± 0.18<br>(1.22, 3.09) | 2.49 ± 0.19<br>(1.56, 2.98) |
| rh_caudalanteriorcingulate | 2.52 ± 0.23<br>(1.32, 3.13) | 2.49 ± 0.2<br>(1.4, 3.09)   | 2.34 ± 0.18<br>(1.77, 2.91) |
| rh_caudalmiddlefrontal     | 2.75 ± 0.12<br>(2.36, 3.1)  | 2.58 ± 0.17<br>(1.57, 3.13) | 2.47 ± 0.15<br>(1.78, 2.92) |
| rh_cuneus                  | 2.09 ± 0.11<br>(1.67, 2.45) | 1.96 ± 0.15<br>(1.32, 2.47) | 1.72 ± 0.13<br>(1.26, 2.16) |
| rh_entorhinal              | 3.42 ± 0.25<br>(2.66, 4.22) | 3.5 ± 0.33<br>(1.9, 4.5)    | 3.18 ± 0.31<br>(1.68, 3.99) |
| rh_fusiform                | 2.9 ± 0.11<br>(2.49, 3.27)  | 2.81 ± 0.15<br>(1.57, 3.21) | 2.55 ± 0.18<br>(1.57, 3.02) |
| rh_inferiorparietal        | 2.65 ± 0.1<br>(2.23, 2.99)  | 2.53 ± 0.15<br>(1.36, 2.96) | 2.38 ± 0.13<br>(1.7, 2.68)  |
| rh_inferiortemporal        | 2.97 ± 0.12<br>(2.56, 3.31) | 2.87 ± 0.14<br>(1.95, 3.35) | 2.7 ± 0.16<br>(1.89, 3.27)  |
| rh_lateraloccipital        | 2.34 ± 0.11<br>(2.0, 2.71)  | 2.33 ± 0.14<br>(1.46, 2.88) | 2.09 ± 0.13<br>(1.54, 2.42) |
| rh_lateralorbitofrontal    | 2.83 ± 0.12<br>(2.29, 3.22) | 2.7 ± 0.15<br>(1.64, 3.16)  | 2.58 ± 0.2<br>(1.87, 3.49)  |
| rh_lingual                 | 2.19 ± 0.12<br>(1.77, 2.57) | 2.08 ± 0.13<br>(1.31, 2.46) | 1.8 ± 0.13<br>(1.32, 2.4)   |
| rh_medialorbitofrontal     | 2.74 ± 0.14<br>(2.29, 3.29) | 2.47 ± 0.14<br>(1.63, 3.06) | 2.38 ± 0.17<br>(1.71, 2.95) |
| rh_middletemporal          | 3.05 ± 0.12<br>(2.59, 3.41) | 2.94 ± 0.15<br>(1.74, 3.41) | 2.77 ± 0.15<br>(1.73, 3.18) |
| rh_parahippocampal         | 2.7 ± 0.21<br>(2.0, 3.41)   | 2.81 ± 0.25<br>(1.84, 3.46) | 2.57 ± 0.23<br>(1.77, 3.2)  |
| rh_paracentral             | 2.58 ± 0.13<br>(2.14, 3.0)  | 2.48 ± 0.16<br>(1.43, 2.94) | 2.24 ± 0.19<br>(1.32, 2.83) |
| rh_parsopercularis         | 2.82 ± 0.12<br>(2.38, 3.25) | 2.61 ± 0.17<br>(1.32, 3.21) | 2.52 ± 0.18<br>(1.67, 3.01) |
| rh_parsorbitalis           | 2.83 ± 0.15<br>(1.71, 3.5)  | 2.75 ± 0.18<br>(1.87, 3.42) | 2.68 ± 0.21<br>(1.52, 3.34) |
| rh_parstriangularis        | 2.7 ± 0.12<br>(2.27, 3.2)   | 2.47 ± 0.17<br>(1.52, 3.06) | 2.43 ± 0.16<br>(1.78, 2.81) |
| rh_pericalcarine           | 2.0 ± 0.12<br>(1.58, 2.4)   | 1.66 ± 0.15<br>(1.11, 2.14) | 1.43 ± 0.12<br>(1.04, 1.87) |
| rh_postcentral             | 2.24 ± 0.1<br>(1.84, 2.64)  | 2.11 ± 0.15<br>(1.55, 2.73) | 2.0 ± 0.13<br>(1.5, 2.52)   |

|                             |                                      |                                      |                                       |
|-----------------------------|--------------------------------------|--------------------------------------|---------------------------------------|
| rh_posteriorcingulate       | 2.53 ± 0.15<br>(1.71, 2.96)          | 2.44 ± 0.17<br>(1.5, 2.98)           | 2.37 ± 0.17<br>(1.48, 2.94)           |
| rh_precentral               | 2.73 ± 0.11<br>(2.19, 3.11)          | 2.57 ± 0.19<br>(1.55, 3.0)           | 2.41 ± 0.18<br>(1.56, 2.84)           |
| rh_precuneus                | 2.55 ± 0.11<br>(2.15, 2.88)          | 2.43 ± 0.15<br>(1.39, 2.83)          | 2.26 ± 0.15<br>(1.41, 2.7)            |
| rh_rostralanteriorcingulate | 3.01 ± 0.2<br>(2.37, 3.74)           | 2.84 ± 0.21<br>(1.42, 3.74)          | 2.69 ± 0.19<br>(1.91, 3.4)            |
| rh_rostralmiddlefrontal     | 2.59 ± 0.12<br>(2.12, 2.96)          | 2.37 ± 0.12<br>(1.7, 2.81)           | 2.33 ± 0.12<br>(1.85, 2.64)           |
| rh_superiorfrontal          | 2.87 ± 0.13<br>(2.41, 3.29)          | 2.71 ± 0.16<br>(1.69, 3.15)          | 2.68 ± 0.15<br>(1.83, 3.13)           |
| rh_superiorparietal         | 2.32 ± 0.1<br>(1.93, 2.62)           | 2.25 ± 0.15<br>(1.72, 2.72)          | 2.11 ± 0.12<br>(1.67, 2.43)           |
| rh_superiortemporal         | 2.94 ± 0.13<br>(2.49, 3.34)          | 2.84 ± 0.18<br>(1.73, 3.29)          | 2.73 ± 0.17<br>(1.81, 3.16)           |
| rh_supramarginal            | 2.7 ± 0.11<br>(2.3, 3.02)            | 2.6 ± 0.17<br>(1.34, 3.01)           | 2.46 ± 0.14<br>(1.8, 2.86)            |
| rh_frontalpole              | 2.86 ± 0.2<br>(1.9, 3.68)            | 2.77 ± 0.24<br>(2.14, 3.82)          | 2.71 ± 0.24<br>(2.0, 3.63)            |
| rh_temporalpole             | 3.65 ± 0.3<br>(2.43, 4.46)           | 3.72 ± 0.31<br>(2.22, 4.51)          | 3.65 ± 0.31<br>(1.95, 4.34)           |
| rh_transversetemporal       | 2.74 ± 0.17<br>(2.18, 3.39)          | 2.44 ± 0.24<br>(1.42, 3.22)          | 2.29 ± 0.27<br>(1.29, 3.0)            |
| rh_insula                   | 3.01 ± 0.14<br>(2.5, 3.44)           | 3.0 ± 0.19<br>(1.58, 3.52)           | 2.87 ± 0.2<br>(1.67, 3.42)            |
| rh_isthmuscingulate         | 2.32 ± 0.17<br>(1.3, 2.86)           | 2.36 ± 0.2<br>(1.36, 3.02)           | 2.25 ± 0.18<br>(1.56, 2.78)           |
| <b>Surface area</b>         |                                      |                                      |                                       |
| lh_bankssts                 | 1053.38 ± 171.64<br>(665.0, 1846.0)  | 986.34 ± 165.16<br>(548.0, 1648.0)   | 976.84 ± 180.32<br>(594.0, 1980.0)    |
| lh_caudalanteriorcingulate  | 691.34 ± 147.15<br>(371.0, 1271.0)   | 622.14 ± 137.16<br>(242.0, 1093.0)   | 602.71 ± 155.23<br>(244.0, 1165.0)    |
| lh_caudalmiddlefrontal      | 2396.83 ± 413.25<br>(1405.0, 4114.0) | 2239.66 ± 353.42<br>(1389.0, 3484.0) | 2136.89 ± 349.59<br>(1320.0, 3369.0)  |
| lh_cuneus                   | 1460.6 ± 211.81<br>(832.0, 2241.0)   | 1516.21 ± 227.26<br>(780.0, 2294.0)  | 1493.34 ± 235.08<br>(922.0, 2578.0)   |
| lh_entorhinal               | 427.6 ± 82.98<br>(264.0, 827.0)      | 456.67 ± 94.27<br>(209.0, 788.0)     | 425.52 ± 91.1<br>(220.0, 769.0)       |
| lh_fusiform                 | 3388.54 ± 469.68<br>(2335.0, 5810.0) | 3084.33 ± 413.82<br>(2095.0, 4423.0) | 3083.27 ± 428.87<br>(1998.0, 4527.0)  |
| lh_inferiorparietal         | 4673.49 ± 688.65<br>(2917.0, 6879.0) | 4332.76 ± 638.5<br>(2651.0, 6728.0)  | 4259.61 ± 654.19<br>(2795.0, 6664.0)  |
| lh_inferiortemporal         | 3416.37 ± 508.99<br>(2179.0, 5703.0) | 3291.04 ± 516.25<br>(1917.0, 5329.0) | 3354.84 ± 549.25<br>(1905.0, 5180.0)  |
| lh_lateraloccipital         | 4714.47 ± 608.92<br>(3197.0, 6860.0) | 4961.33 ± 682.67<br>(3466.0, 7890.0) | 4917.11 ± 698.71<br>(3165.0, 11152.0) |
| lh_lateralorbitofrontal     | 2651.36 ± 312.34<br>(1706.0, 3672.0) | 2604.8 ± 306.53<br>(1835.0, 3637.0)  | 2601.02 ± 387.44<br>(1379.0, 3863.0)  |
| lh_lingual                  | 3100.65 ± 438.81<br>(1876.0, 4880.0) | 2974.76 ± 391.85<br>(2013.0, 4251.0) | 2988.85 ± 440.46<br>(1873.0, 5771.0)  |
| lh_medialorbitofrontal      | 1979.43 ± 300.2<br>(1239.0, 2980.0)  | 1877.2 ± 236.07<br>(1249.0, 2842.0)  | 1905.66 ± 257.9<br>(1214.0, 2680.0)   |
| lh_middletemporal           | 3158.1 ± 430.01<br>(1979.0, 4750.0)  | 3104.57 ± 453.27<br>(2011.0, 5027.0) | 3144.52 ± 477.53<br>(2043.0, 4879.0)  |
| lh_parahippocampal          | 732.64 ± 117.89<br>(435.0, 1495.0)   | 651.31 ± 84.01<br>(449.0, 1136.0)    | 641.27 ± 80.7<br>(435.0, 967.0)       |

|                             |                                       |                                       |                                      |
|-----------------------------|---------------------------------------|---------------------------------------|--------------------------------------|
| lh_paracentral              | 1316.36 ± 187.07<br>(856.0, 2068.0)   | 1372.41 ± 160.49<br>(994.0, 1950.0)   | 1301.99 ± 174.4<br>(868.0, 2022.0)   |
| lh_parsopercularis          | 1708.95 ± 277.34<br>(1128.0, 2868.0)  | 1551.55 ± 246.14<br>(1005.0, 2606.0)  | 1541.88 ± 258.81<br>(977.0, 2832.0)  |
| lh_parsorbitalis            | 637.36 ± 86.02<br>(399.0, 902.0)      | 683.42 ± 98.47<br>(433.0, 1046.0)     | 684.83 ± 105.24<br>(350.0, 1024.0)   |
| lh_parstriangularis         | 1305.33 ± 203.1<br>(865.0, 2098.0)    | 1295.01 ± 207.3<br>(878.0, 2058.0)    | 1285.38 ± 223.94<br>(818.0, 2059.0)  |
| lh_pericalcarine            | 1476.24 ± 244.24<br>(733.0, 2203.0)   | 1385.14 ± 244.49<br>(805.0, 2302.0)   | 1348.61 ± 263.14<br>(736.0, 2983.0)  |
| lh_postcentral              | 4152.85 ± 504.64<br>(2872.0, 6136.0)  | 4072.61 ± 480.65<br>(2901.0, 5627.0)  | 3953.65 ± 530.9<br>(2047.0, 6302.0)  |
| lh_posteriorcingulate       | 1223.09 ± 191.39<br>(794.0, 2742.0)   | 1168.6 ± 187.72<br>(508.0, 1842.0)    | 1083.22 ± 199.62<br>(516.0, 1848.0)  |
| lh_precentral               | 4817.05 ± 558.52<br>(3547.0, 8794.0)  | 4835.93 ± 531.06<br>(3424.0, 7071.0)  | 4637.6 ± 533.64<br>(2921.0, 6464.0)  |
| lh_precuneus                | 3860.43 ± 504.58<br>(2554.0, 5685.0)  | 3775.1 ± 509.66<br>(2608.0, 5858.0)   | 3644.35 ± 545.93<br>(2185.0, 5573.0) |
| lh_rostralanteriorcingulate | 873.77 ± 166.85<br>(441.0, 1457.0)    | 836.8 ± 167.49<br>(420.0, 1756.0)     | 821.56 ± 180.75<br>(301.0, 1350.0)   |
| lh_rostralmiddlefrontal     | 6006.56 ± 785.81<br>(4049.0, 8461.0)  | 5567.62 ± 815.46<br>(3606.0, 8699.0)  | 5471.95 ± 847.7<br>(3253.0, 8234.0)  |
| lh_superiorfrontal          | 7367.41 ± 909.43<br>(5087.0, 10695.0) | 7344.35 ± 949.15<br>(5085.0, 11235.0) | 7098.37 ± 917.23<br>(5129.0, 9978.0) |
| lh_superiorparietal         | 5495.69 ± 688.6<br>(3608.0, 8020.0)   | 5301.95 ± 708.18<br>(3672.0, 7965.0)  | 5158.11 ± 707.39<br>(2768.0, 7357.0) |
| lh_superiortemporal         | 3838.03 ± 467.85<br>(2622.0, 5381.0)  | 3875.5 ± 475.41<br>(2606.0, 5786.0)   | 3897.28 ± 511.27<br>(2606.0, 5867.0) |
| lh_supramarginal            | 3950.25 ± 591.19<br>(2338.0, 6190.0)  | 3985.89 ± 677.89<br>(2345.0, 6548.0)  | 3939.01 ± 676.56<br>(2081.0, 6323.0) |
| lh_frontalpole              | 202.72 ± 35.61<br>(84.0, 317.0)       | 250.13 ± 30.87<br>(158.0, 367.0)      | 262.08 ± 34.46<br>(166.0, 368.0)     |
| lh_temporalpole             | 499.32 ± 60.04<br>(331.0, 725.0)      | 470.71 ± 64.24<br>(291.0, 717.0)      | 484.05 ± 67.89<br>(255.0, 705.0)     |
| lh_transversetemporal       | 451.43 ± 77.16<br>(285.0, 735.0)      | 445.14 ± 75.06<br>(269.0, 727.0)      | 448.0 ± 73.58<br>(262.0, 850.0)      |
| lh_insula                   | 2280.14 ± 277.95<br>(1587.0, 3778.0)  | 2420.41 ± 282.14<br>(1727.0, 3248.0)  | 2368.4 ± 306.48<br>(1530.0, 3460.0)  |
| lh_isthmuscingulate         | 1123.58 ± 388.53<br>(641.0, 3189.0)   | 1011.94 ± 166.44<br>(613.0, 1559.0)   | 956.99 ± 164.76<br>(492.0, 1545.0)   |
| rh_bankssts                 | 976.6 ± 144.02<br>(609.0, 1568.0)     | 890.76 ± 131.25<br>(556.0, 1646.0)    | 871.41 ± 134.47<br>(506.0, 1346.0)   |
| rh_caudalanteriorcingulate  | 828.71 ± 211.06<br>(411.0, 2079.0)    | 718.1 ± 153.08<br>(250.0, 1333.0)     | 695.25 ± 168.7<br>(213.0, 1368.0)    |
| rh_caudalmiddlefrontal      | 2216.54 ± 399.24<br>(1176.0, 3666.0)  | 2158.12 ± 351.13<br>(1338.0, 3259.0)  | 2034.54 ± 346.82<br>(1216.0, 3443.0) |
| rh_cuneus                   | 1500.53 ± 231.56<br>(536.0, 2292.0)   | 1615.99 ± 239.9<br>(1060.0, 2512.0)   | 1593.99 ± 239.71<br>(977.0, 2594.0)  |
| rh_entorhinal               | 361.34 ± 84.01<br>(175.0, 720.0)      | 417.93 ± 85.47<br>(214.0, 796.0)      | 386.14 ± 79.83<br>(207.0, 776.0)     |
| rh_fusiform                 | 3291.5 ± 468.88<br>(2151.0, 5018.0)   | 3001.78 ± 412.6<br>(2016.0, 4400.0)   | 2987.5 ± 417.22<br>(1920.0, 4574.0)  |
| rh_inferiorparietal         | 5619.08 ± 786.66<br>(3599.0, 8234.0)  | 5159.38 ± 762.51<br>(3366.0, 8206.0)  | 5101.41 ± 804.26<br>(3197.0, 8136.0) |
| rh_inferiortemporal         | 3272.24 ± 487.16<br>(1969.0, 4849.0)  | 3234.49 ± 486.02<br>(2077.0, 4837.0)  | 3186.9 ± 551.44<br>(1565.0, 5299.0)  |
| rh_lateraloccipital         | 4612.24 ± 634.81<br>(3042.0, 6691.0)  | 4950.63 ± 691.67<br>(3383.0, 7858.0)  | 4946.86 ± 706.41<br>(3421.0, 9816.0) |



|                             |                                       |                                        |                                        |
|-----------------------------|---------------------------------------|----------------------------------------|----------------------------------------|
| rh_lateralorbitofrontal     | 2584.27 ± 320.3<br>(1647.0, 3859.0)   | 2529.25 ± 331.83<br>(1664.0, 3617.0)   | 2659.53 ± 386.17<br>(1518.0, 3886.0)   |
| rh_lingual                  | 3119.82 ± 430.54<br>(1955.0, 4921.0)  | 3168.98 ± 434.64<br>(2064.0, 4557.0)   | 3128.77 ± 444.36<br>(2058.0, 4578.0)   |
| rh_medialorbitofrontal      | 1842.98 ± 228.0<br>(1161.0, 2886.0)   | 1943.4 ± 227.14<br>(1201.0, 2757.0)    | 2046.34 ± 255.02<br>(1234.0, 2906.0)   |
| rh_middletemporal           | 3502.88 ± 465.15<br>(2259.0, 5225.0)  | 3439.19 ± 455.83<br>(2315.0, 5718.0)   | 3439.75 ± 501.62<br>(1993.0, 5186.0)   |
| rh_parahippocampal          | 701.38 ± 106.96<br>(412.0, 1232.0)    | 628.2 ± 79.79<br>(423.0, 1050.0)       | 612.17 ± 82.92<br>(403.0, 960.0)       |
| rh_paracentral              | 1508.87 ± 226.22<br>(1009.0, 2414.0)  | 1528.36 ± 193.67<br>(1033.0, 2442.0)   | 1457.07 ± 213.66<br>(887.0, 2450.0)    |
| rh_parsopercularis          | 1439.96 ± 247.47<br>(859.0, 2864.0)   | 1326.63 ± 202.01<br>(873.0, 2492.0)    | 1299.66 ± 197.66<br>(823.0, 2243.0)    |
| rh_parsorbitalis            | 793.96 ± 104.51<br>(485.0, 1121.0)    | 822.81 ± 112.62<br>(558.0, 1157.0)     | 828.62 ± 120.84<br>(455.0, 1234.0)     |
| rh_parstriangularis         | 1523.83 ± 248.76<br>(913.0, 2393.0)   | 1492.01 ± 237.97<br>(944.0, 2350.0)    | 1480.25 ± 240.02<br>(918.0, 2259.0)    |
| rh_pericalcarine            | 1614.86 ± 259.73<br>(726.0, 2484.0)   | 1554.12 ± 269.68<br>(967.0, 2378.0)    | 1500.53 ± 272.49<br>(923.0, 3045.0)    |
| rh_postcentral              | 3974.74 ± 483.7<br>(2744.0, 6076.0)   | 3960.2 ± 460.72<br>(2622.0, 5779.0)    | 3845.02 ± 491.44<br>(1975.0, 5310.0)   |
| rh_posteriorcingulate       | 1261.45 ± 215.38<br>(773.0, 2248.0)   | 1173.58 ± 188.33<br>(454.0, 1803.0)    | 1104.01 ± 217.61<br>(526.0, 2042.0)    |
| rh_precentral               | 4896.35 ± 573.52<br>(3359.0, 7898.0)  | 4836.9 ± 530.77<br>(3518.0, 6821.0)    | 4659.18 ± 534.85<br>(3403.0, 6657.0)   |
| rh_precuneus                | 4074.24 ± 560.2<br>(2576.0, 6051.0)   | 3945.72 ± 530.99<br>(2771.0, 6000.0)   | 3784.85 ± 547.35<br>(2471.0, 5847.0)   |
| rh_rostralanteriorcingulate | 674.04 ± 141.67<br>(321.0, 1134.0)    | 596.02 ± 129.23<br>(245.0, 1004.0)     | 599.97 ± 141.44<br>(226.0, 1374.0)     |
| rh_rostralmiddlefrontal     | 6238.1 ± 819.03<br>(4311.0, 8773.0)   | 5779.82 ± 836.16<br>(3623.0, 8979.0)   | 5670.49 ± 877.3<br>(3384.0, 8120.0)    |
| rh_superiorfrontal          | 7208.25 ± 900.78<br>(5014.0, 11507.0) | 7066.97 ± 938.17<br>(4811.0, 10224.0)  | 6801.87 ± 938.02<br>(4409.0, 10145.0)  |
| rh_superiorparietal         | 5501.73 ± 679.77<br>(3758.0, 7799.0)  | 5243.15 ± 655.57<br>(3197.0, 7605.0)   | 5086.26 ± 697.03<br>(2993.0, 7023.0)   |
| rh_superiortemporal         | 3655.23 ± 427.22<br>(2622.0, 5245.0)  | 3623.12 ± 423.85<br>(2529.0, 5258.0)   | 3629.2 ± 430.03<br>(2321.0, 5190.0)    |
| rh_supramarginal            | 3718.07 ± 550.78<br>(2207.0, 5570.0)  | 3638.1 ± 551.2<br>(2189.0, 5862.0)     | 3536.38 ± 540.26<br>(2063.0, 5519.0)   |
| rh_frontalpole              | 279.6 ± 46.57<br>(145.0, 465.0)       | 303.73 ± 37.44<br>(185.0, 437.0)       | 325.84 ± 44.61<br>(221.0, 501.0)       |
| rh_temporalpole             | 437.66 ± 57.47<br>(279.0, 642.0)      | 463.15 ± 61.7<br>(275.0, 716.0)        | 474.43 ± 65.51<br>(282.0, 685.0)       |
| rh_transversetemporal       | 333.36 ± 55.6<br>(196.0, 545.0)       | 329.44 ± 50.5<br>(198.0, 533.0)        | 324.52 ± 49.72<br>(189.0, 503.0)       |
| rh_insula                   | 2416.25 ± 294.51<br>(1568.0, 3401.0)  | 2365.08 ± 305.29<br>(1662.0, 3690.0)   | 2255.7 ± 308.63<br>(1526.0, 3528.0)    |
| rh_isthmuscingulate         | 986.03 ± 172.69<br>(597.0, 2045.0)    | 906.29 ± 142.14<br>(387.0, 1476.0)     | 857.27 ± 140.75<br>(500.0, 1365.0)     |
| <b>Subcortical regions</b>  |                                       |                                        |                                        |
| lh_thalamus                 | 8458.28 ± 917.31<br>(5945.0, 11399.0) | 7379.46 ± 1016.95<br>(4773.9, 10102.6) | 7887.47 ± 1133.83<br>(4862.6, 13008.3) |
| lh_hippocampus              | 4421.63 ± 486.12<br>(1262.0, 6037.0)  | 3935.66 ± 463.96<br>(2459.0, 5674.6)   | 4145.08 ± 492.97<br>(2948.8, 5587.3)   |
| lh_caudate                  | 3809.0 ± 476.3<br>(2575.0, 5546.0)    | 3411.67 ± 470.37<br>(2327.6, 5464.7)   | 3260.05 ± 463.68<br>(2141.9, 5324.4)   |

|                      |                                        |                                         |                                        |
|----------------------|----------------------------------------|-----------------------------------------|----------------------------------------|
| lh_accumbens         | 564.41 ± 93.32<br>(317.0, 1039.0)      | 347.55 ± 88.17<br>(131.2, 636.7)        | 402.64 ± 105.21<br>(144.2, 874.5)      |
| lh_pallidum          | 1361.7 ± 235.78<br>(728.0, 2325.0)     | 2078.38 ± 274.19<br>(1423.8, 3255.8)    | 1986.89 ± 319.71<br>(1327.5, 4357.7)   |
| lh_putamen           | 5519.14 ± 733.5<br>(3663.0, 7832.0)    | 4479.68 ± 609.13<br>(2452.8, 6548.0)    | 4504.39 ± 668.87<br>(2764.9, 6738.9)   |
| lh_amygdala          | 1555.67 ± 204.41<br>(1029.0, 2307.0)   | 1524.7 ± 241.73<br>(913.7, 2308.6)      | 1490.89 ± 239.86<br>(373.5, 2223.3)    |
| lh_lateral_ventricle | 6477.73 ± 3612.59<br>(1512.0, 25798.0) | 12952.04 ± 8919.29<br>(2513.0, 63928.2) | 9530.91 ± 5730.23<br>(2251.3, 46817.4) |
| rh_thalamus          | 7395.51 ± 779.14<br>(5406.0, 10186.0)  | 7196.68 ± 926.59<br>(4670.9, 10040.7)   | 7268.21 ± 917.56<br>(4935.2, 11513.2)  |
| rh_hippocampus       | 4487.01 ± 459.66<br>(2351.0, 6053.0)   | 4068.98 ± 483.31<br>(2737.3, 6151.1)    | 4240.42 ± 497.69<br>(2803.6, 5867.0)   |
| rh_caudate           | 3929.9 ± 486.87<br>(2604.0, 5749.0)    | 3486.72 ± 486.67<br>(2229.4, 6055.6)    | 3355.72 ± 469.05<br>(2128.3, 5136.5)   |
| rh_accumbens         | 599.66 ± 99.93<br>(324.0, 907.0)       | 473.93 ± 91.44<br>(218.7, 782.7)        | 502.15 ± 106.62<br>(262.9, 843.3)      |
| rh_pallidum          | 1495.2 ± 200.54<br>(747.0, 2276.0)     | 2021.31 ± 271.32<br>(1368.2, 3016.9)    | 2021.71 ± 317.2<br>(1346.8, 3577.6)    |
| rh_putamen           | 5582.43 ± 638.59<br>(3807.0, 8102.0)   | 4608.44 ± 624.23<br>(2668.7, 6643.6)    | 4606.17 ± 639.34<br>(3095.0, 6550.5)   |
| rh_amygdala          | 1636.84 ± 217.59<br>(1000.0, 2847.0)   | 1688.84 ± 237.88<br>(786.8, 2595.5)     | 1690.71 ± 246.05<br>(938.3, 2906.9)    |
| rh_lateral_ventricle | 6003.53 ± 3243.89<br>(1188.0, 27206.0) | 11712.6 ± 7863.29<br>(1644.8, 50952.1)  | 8804.38 ± 5501.47<br>(2272.7, 48357.2) |

**Supplementary Table S3.** Sample and demographic information for the three cohorts used for brain age prediction

| Cohort                                   | Sample size | Males/Females | Age range (mean $\pm$ SD) |
|------------------------------------------|-------------|---------------|---------------------------|
| <b>Datasets used in the training set</b> |             |               |                           |
| <b>HCP</b>                               | 890         | 403/487       | 28.79 $\pm$ 3.70          |
| <b>Cam-CAN</b>                           | 500         | 249/251       | 54.40 $\pm$ 18.26         |
| <b>IXI</b>                               | 453         | 200/253       | 48.13 $\pm$ 16.54         |
| <b>Hold-out test datasets</b>            |             |               |                           |
| <b>HCP</b>                               | 223         | 104/119       | 28.85 $\pm$ 3.69          |
| <b>Cam-CAN</b>                           | 101         | 50/51         | 54.38 $\pm$ 17.51         |
| <b>IXI</b>                               | 114         | 51/63         | 48.85 $\pm$ 16.32         |

**Supplementary Table S4.** List of the top 20 regional features by mean absolute SHAP value for the HCP cohort.

| <b>Least Absolute Shrinkage and Selection Operator (Lasso) Regression</b> |                   |
|---------------------------------------------------------------------------|-------------------|
| <b>Feature</b>                                                            | <b>SHAP value</b> |
| Total intracranial volume                                                 | 1.2464            |
| Right inferior parietal lobule surface area                               | 0.4976            |
| Left pallidum volume                                                      | 0.3981            |
| Left superior frontal gyrus cortical thickness                            | 0.3069            |
| Right putamen volume                                                      | 0.2946            |
| Right middle temporal gyrus surface area                                  | 0.2569            |
| Left inferior temporal gyrus cortical thickness                           | 0.2536            |
| Left lateral orbitofrontal gyrus surface area                             | 0.2401            |
| Left posterior cingulate cortex cortical thickness                        | 0.2303            |
| Left caudal middle frontal gyrus cortical thickness                       | 0.2234            |
| Left superior frontal gyrus surface area                                  | 0.2227            |
| Left pericalcarine gyrus surface area                                     | 0.2013            |
| Left pars triangularis cortical thickness                                 | 0.2001            |
| Left middle temporal gyrus surface area                                   | 0.1948            |
| Right frontal pole surface area                                           | 0.1914            |
| Right insula cortical thickness                                           | 0.1860            |
| Left lingual gyrus cortical thickness                                     | 0.1784            |
| Right insula surface area                                                 | 0.1770            |
| Right hippocampus volume                                                  | 0.1696            |
| Left precuneus surface area                                               | 0.1618            |
| <b>Gaussian Process Regression</b>                                        |                   |
| <b>Feature</b>                                                            | <b>SHAP value</b> |
| Total intracranial volume                                                 | 3.4492            |
| Right inferior parietal lobule surface area                               | 0.7329            |
| Left superior frontal gyrus surface area                                  | 0.6324            |
| Left superior frontal gyrus cortical thickness                            | 0.6018            |
| Left rostral middle frontal gyrus cortical thickness                      | 0.5512            |
| Left pallidum volume                                                      | 0.4568            |
| Right putamen volume                                                      | 0.4552            |
| Left pericalcarine gyrus surface area                                     | 0.4398            |
| Left lateral orbitofrontal gyrus surface area                             | 0.4149            |
| Right thalamus volume                                                     | 0.4047            |
| Left caudal middle frontal gyrus cortical thickness                       | 0.3955            |
| Right middle temporal gyrus surface area                                  | 0.3938            |

|                                                      |                   |
|------------------------------------------------------|-------------------|
| Right superior temporal gyrus surface area           | 0.3915            |
| Right supramarginal gyrus cortical thickness         | 0.3741            |
| Left precentral gyrus cortical thickness             | 0.3660            |
| Right postcentral gyrus cortical thickness           | 0.3525            |
| Right lateral orbitofrontal gyrus cortical thickness | 0.3474            |
| Right lingual gyrus surface area                     | 0.3265            |
| Left lingual gyrus cortical thickness                | 0.3219            |
| Left pericalcarine gyrus cortical thickness          | 0.3115            |
| <b>Gradient Boosting Machine</b>                     |                   |
| <b>Feature</b>                                       | <b>SHAP value</b> |
| Left pallidum volume                                 | 0.2522            |
| Left caudal middle frontal gyrus cortical thickness  | 0.2170            |
| Left posterior cingulate cortex cortical thickness   | 0.1630            |
| Left middle temporal gyrus surface area              | 0.1283            |
| Right superior frontal gyrus cortical thickness      | 0.1263            |
| Left superior frontal gyrus cortical thickness       | 0.1257            |
| Left temporal pole cortical thickness                | 0.1234            |
| Left precuneus surface area                          | 0.1231            |
| Left insula cortical thickness                       | 0.1216            |
| Left lateral orbitofrontal gyrus cortical thickness  | 0.1146            |
| Left isthmus cingulate surface area                  | 0.1140            |
| Left pars triangularis cortical thickness            | 0.1099            |
| Total intracranial volume                            | 0.1089            |
| Left thalamus volume                                 | 0.1083            |
| Right lateral orbitofrontal gyrus surface area       | 0.1075            |
| Right insula surface area                            | 0.1066            |
| Right inferior parietal lobule surface area          | 0.1043            |
| Right hippocampus volume                             | 0.0993            |
| Right precentral gyrus cortical thickness            | 0.0992            |
| Right caudal middle frontal gyrus cortical thickness | 0.0963            |

**Supplementary Table S5.** List of the top 20 regional features by mean absolute SHAP value for the Cam-CAN cohort.

| <b>Least Absolute Shrinkage and Selection Operator (Lasso) Regression</b> |                   |
|---------------------------------------------------------------------------|-------------------|
| <b>Feature</b>                                                            | <b>SHAP value</b> |
| Total intracranial volume                                                 | 7.7143            |
| Left thalamus volume                                                      | 2.8638            |
| Left superior frontal gyrus cortical thickness                            | 2.2929            |
| Left superior frontal gyrus surface area                                  | 1.5312            |
| Right precentral gyrus surface area                                       | 1.3444            |
| Left precuneus cortical thickness                                         | 1.3436            |
| Left insula surface area                                                  | 1.3076            |
| Right precentral gyrus cortical thickness                                 | 1.2582            |
| Left supramarginal gyrus cortical thickness                               | 1.2476            |
| Left amygdala volume                                                      | 1.2339            |
| Left fusiform gyrus surface area                                          | 1.1621            |
| Left superior parietal lobule surface area                                | 1.1137            |
| Right caudal middle frontal gyrus cortical thickness                      | 1.0820            |
| Left superior temporal gyrus cortical thickness                           | 1.0483            |
| Left temporal pole cortical thickness                                     | 1.0472            |
| Left lateral orbitofrontal gyrus surface area                             | 0.9624            |
| Left posterior cingulate cortex surface area                              | 0.9527            |
| Right lateral occipital gyrus surface area                                | 0.9420            |
| Right superior parietal lobule cortical thickness                         | 0.8872            |
| Left entorhinal cortex cortical thickness                                 | 0.8868            |
| <b>Gaussian Process Regression</b>                                        |                   |
| <b>Feature</b>                                                            | <b>SHAP value</b> |
| Total intracranial volume                                                 | 8.8313            |
| Left superior frontal gyrus cortical thickness                            | 3.0479            |
| Left thalamus volume                                                      | 2.4525            |
| Left precuneus cortical thickness                                         | 2.1928            |
| Left pallidum volume                                                      | 1.9247            |
| Left superior frontal gyrus surface area                                  | 1.9213            |
| Right precuneus cortical thickness                                        | 1.8973            |
| Right precentral gyrus surface area                                       | 1.7306            |
| Left amygdala volume                                                      | 1.5316            |
| Left supramarginal gyrus cortical thickness                               | 1.4707            |
| Left lateral orbitofrontal gyrus surface area                             | 1.4277            |
| Left pericalcarine gyrus surface area                                     | 1.3613            |

|                                                       |                   |
|-------------------------------------------------------|-------------------|
| Right caudal middle frontal gyrus cortical thickness  | 1.3169            |
| Left posterior cingulate cortex surface area          | 1.2871            |
| Right superior temporal gyrus surface area            | 1.2820            |
| Right cuneus surface area                             | 1.2775            |
| Right lateral occipital gyrus surface area            | 1.2592            |
| Left superior parietal lobule surface area            | 1.2243            |
| Right rostral middle frontal gyrus cortical thickness | 1.2199            |
| Right thalamus volume                                 | 1.2174            |
| <b>Gradient Boosting Machine</b>                      |                   |
| <b>Feature</b>                                        | <b>SHAP value</b> |
| Left lateral ventricles volume                        | 1.0214            |
| Right lateral ventricles volume                       | 0.9673            |
| Left thalamus volume                                  | 0.9094            |
| Total intracranial volume                             | 0.7257            |
| Left superior frontal gyrus cortical thickness        | 0.7183            |
| Right nucleus accumbens volume                        | 0.6493            |
| Right supramarginal gyrus cortical thickness          | 0.6390            |
| Left superior temporal gyrus cortical thickness       | 0.6242            |
| Right superior temporal gyrus cortical thickness      | 0.6190            |
| Right precentral gyrus cortical thickness             | 0.5824            |
| Left precentral gyrus cortical thickness              | 0.4496            |
| Left supramarginal gyrus cortical thickness           | 0.4224            |
| Right superior frontal gyrus cortical thickness       | 0.4029            |
| Right pars opercularis cortical thickness             | 0.3645            |
| Left amygdala volume                                  | 0.3140            |
| Right putamen volume                                  | 0.2894            |
| Left temporal pole cortical thickness                 | 0.2730            |
| Left precuneus cortical thickness                     | 0.2694            |
| Right inferior parietal lobule cortical thickness     | 0.2604            |
| Right insula cortical thickness                       | 0.2603            |

**Supplementary Table S6.** List of the top 20 regional features by mean absolute SHAP value for the IXI cohort.

| <b>Least Absolute Shrinkage and Selection Operator (Lasso) Regression</b> |                   |
|---------------------------------------------------------------------------|-------------------|
| <b>Feature</b>                                                            | <b>SHAP value</b> |
| Total intracranial volume                                                 | 4.3064            |
| Left superior frontal gyrus cortical thickness                            | 2.8943            |
| Left thalamus volume                                                      | 2.3970            |
| Right middle temporal gyrus surface area                                  | 2.3649            |
| Left superior frontal gyrus surface area                                  | 2.0884            |
| Right precuneus surface area                                              | 1.5263            |
| Left pericalcarine gyrus surface area                                     | 1.4622            |
| Right inferior parietal lobule cortical thickness                         | 1.4438            |
| Right cuneus surface area                                                 | 1.3514            |
| Left superior temporal gyrus surface area                                 | 1.2764            |
| Right putamen volume                                                      | 1.2621            |
| Right temporal pole surface area                                          | 1.1248            |
| Right precentral gyrus surface area                                       | 1.0995            |
| Right pars triangularis cortical thickness                                | 1.0666            |
| Left lateral orbitofrontal gyrus surface area                             | 0.9724            |
| Right rostral middle frontal gyrus surface area                           | 0.9654            |
| Left lateral ventricles volume                                            | 0.9628            |
| Left middle temporal gyrus surface area                                   | 0.9569            |
| Left precuneus cortical thickness                                         | 0.9446            |
| Left medial orbitofrontal cortical thickness                              | 0.9379            |
| <b>Gaussian Process Regression</b>                                        |                   |
| <b>Feature</b>                                                            | <b>SHAP value</b> |
| Total Intracranial Volume                                                 | 4.9332            |
| Left Superior frontal gyrus Cortical thickness                            | 3.2885            |
| Right precuneus surface area                                              | 3.2639            |
| Right middle temporal gyrus surface area                                  | 2.9548            |
| Left thalamus volume                                                      | 2.6361            |
| Left hippocampus volume                                                   | 2.1959            |
| Left pericalcarine gyrus surface area                                     | 2.1729            |
| Left precuneus surface area                                               | 2.1036            |
| Right rostral middle frontal gyrus surface area                           | 2.0488            |
| Left superior frontal gyrus surface area                                  | 1.8995            |
| Left lateral orbitofrontal gyrus surface area                             | 1.8229            |
| Right inferior parietal lobule cortical thickness                         | 1.7784            |



|                                                           |                   |
|-----------------------------------------------------------|-------------------|
| Right insula surface area                                 | 1.7700            |
| Right putamen volume                                      | 1.6108            |
| Left superior temporal gyrus surface area                 | 1.5758            |
| Left precuneus cortical thickness                         | 1.5754            |
| Right superior frontal gyrus surface area                 | 1.5263            |
| Right hippocampus volume                                  | 1.5207            |
| Right superior parietal lobule cortical thickness         | 1.4359            |
| Right pars orbitalis surface area                         | 1.3637            |
| <b>Gradient Boosting Machine</b>                          |                   |
| <b>Feature</b>                                            | <b>SHAP value</b> |
| Right lateral ventricles volume                           | 1.1698            |
| Left lateral ventricles volume                            | 1.0374            |
| Left thalamus volume                                      | 0.8868            |
| Right pars triangularis cortical thickness                | 0.6585            |
| Right putamen volume                                      | 0.6178            |
| Left pars opercularis cortical thickness                  | 0.6138            |
| Right superior frontal gyrus cortical thickness           | 0.6012            |
| Left precentral gyrus cortical thickness                  | 0.4913            |
| Left nucleus accumbens volume                             | 0.4817            |
| Left superior frontal gyrus cortical thickness            | 0.4548            |
| Right nucleus accumbens volume                            | 0.4176            |
| Right entorhinal cortex surface area                      | 0.4167            |
| Left rostral anterior cingulate cortex cortical thickness | 0.3975            |
| Right pars opercularis cortical thickness                 | 0.3707            |
| Left pars triangularis cortical thickness                 | 0.3424            |
| Right thalamus volume                                     | 0.3240            |
| Right paracentral cortical thickness                      | 0.3120            |
| Right middle temporal gyrus surface area                  | 0.3112            |
| Right rostral middle frontal gyrus cortical thickness     | 0.3086            |
| Right insula cortical thickness                           | 0.3031            |

**Supplementary Table S7.** The algorithm performance based on the structural features from the HCP individuals entered in the model for model performance in the training data (n = 890) and prediction performance in the hold-out test data (n = 223).

| Algorithm         | Model performance |        |                 |        | Prediction performance |        |                 |        |
|-------------------|-------------------|--------|-----------------|--------|------------------------|--------|-----------------|--------|
|                   | R                 | MAE    | Weighted<br>MAE | RMSE   | R                      | MAE    | Weighted<br>MAE | RMSE   |
| Lasso             | 0.4921            | 2.6444 | 0.1763          | 3.2266 | 0.4258                 | 2.7565 | 0.1838          | 3.3425 |
| Lasso LAR         | 0.4921            | 2.6444 | 0.1763          | 3.2266 | 0.4258                 | 2.7565 | 0.1838          | 3.3425 |
| SVR               | 0.4515            | 2.6981 | 0.1799          | 3.3156 | 0.4268                 | 2.7756 | 0.1850          | 3.3378 |
| LAR               | 0.4723            | 2.6933 | 0.1796          | 3.2779 | 0.4124                 | 2.7896 | 0.1860          | 3.3964 |
| Elastic Net       | 0.4714            | 2.6737 | 0.1782          | 3.2688 | 0.4199                 | 2.7919 | 0.1861          | 3.3469 |
| Bayesian<br>Ridge | 0.4712            | 2.6745 | 0.1783          | 3.2697 | 0.4182                 | 2.7927 | 0.1862          | 3.3514 |
| Ridge             | 0.4698            | 2.6797 | 0.1786          | 3.2706 | 0.4255                 | 2.7941 | 0.1863          | 3.3353 |
| ARD               | 0.4973            | 2.6373 | 0.1758          | 3.2408 | 0.3991                 | 2.8251 | 0.1883          | 3.4551 |
| Random<br>Forest  | 0.4245            | 2.7785 | 0.1852          | 3.3648 | 0.4131                 | 2.8304 | 0.1887          | 3.3757 |
| PAR               | 0.4563            | 2.7231 | 0.1815          | 3.3643 | 0.4010                 | 2.8322 | 0.1888          | 3.4451 |
| CatBoost          | 0.4282            | 2.7631 | 0.1842          | 3.3465 | 0.4069                 | 2.8328 | 0.1889          | 3.3682 |
| RVR               | 0.4498            | 2.7148 | 0.1810          | 3.3407 | 0.4021                 | 2.8371 | 0.1891          | 3.4017 |
| LightGBM          | 0.4273            | 2.7457 | 0.1830          | 3.3473 | 0.4016                 | 2.8418 | 0.1895          | 3.3782 |
| GBM               | 0.4458            | 2.7149 | 0.1810          | 3.3086 | 0.4000                 | 2.8437 | 0.1896          | 3.3805 |
| kNN               | 0.3768            | 2.8367 | 0.1891          | 3.4310 | 0.3801                 | 2.8591 | 0.1906          | 3.4166 |
| AdaBoost          | 0.3982            | 2.8003 | 0.1867          | 3.3975 | 0.4188                 | 2.8595 | 0.1906          | 3.3701 |
| Extra Trees       | 0.4224            | 2.7738 | 0.1849          | 3.3750 | 0.4197                 | 2.8674 | 0.1912          | 3.3793 |
| XGBoost           | 0.4201            | 2.7726 | 0.1848          | 3.3709 | 0.3859                 | 2.8771 | 0.1918          | 3.4145 |
| Kernel<br>Ridge   | 0.4417            | 2.7495 | 0.1833          | 3.4199 | 0.3878                 | 2.8775 | 0.1918          | 3.5100 |
| GPR               | 0.4735            | 2.7199 | 0.1813          | 3.3656 | 0.3689                 | 2.9420 | 0.1961          | 3.6260 |
| MLP               | 0.4744            | 2.7216 | 0.1814          | 3.3665 | 0.3675                 | 2.9450 | 0.1963          | 3.6365 |
| OMP               | 0.4790            | 2.6927 | 0.1795          | 3.3220 | 0.3590                 | 2.9457 | 0.1964          | 3.6112 |
| LR                | 0.4736            | 2.7244 | 0.1816          | 3.3695 | 0.3679                 | 2.9474 | 0.1965          | 3.6353 |
| Huber             | 0.4705            | 2.7366 | 0.1824          | 3.3859 | 0.3674                 | 2.9484 | 0.1966          | 3.6416 |
| Theil-Sen         | 0.4663            | 2.7544 | 0.1836          | 3.4066 | 0.3398                 | 2.9724 | 0.1982          | 3.7220 |
| RANSAC            | 0.4553            | 2.8094 | 0.1873          | 3.4962 | 0.3627                 | 3.0015 | 0.2001          | 3.7149 |
| Decision<br>Tree  | 0.1694            | 3.0653 | 0.2044          | 3.6947 | 0.1122                 | 3.1206 | 0.2080          | 3.6980 |

**Supplementary Table S8.** The algorithm performance based on the structural features from the Cam-CAN individuals entered in the model for model performance in the training data (n = 500) and prediction performance in the hold-out test data (n = 101).

| Algorithm             | Model performance |        |                 |         | Prediction performance |         |                 |         |
|-----------------------|-------------------|--------|-----------------|---------|------------------------|---------|-----------------|---------|
|                       | R                 | MAE    | Weighted<br>MAE | RMSE    | R                      | MAE     | Weighted<br>MAE | RMSE    |
| <b>Lasso LAR</b>      | 0.8952            | 6.6767 | 0.0954          | 8.2589  | 0.8589                 | 7.0830  | 0.1012          | 8.9581  |
| <b>ARD</b>            | 0.8992            | 6.5372 | 0.0934          | 8.1039  | 0.8585                 | 7.1040  | 0.1015          | 8.9490  |
| <b>Lasso</b>          | 0.8943            | 6.6898 | 0.0956          | 8.3192  | 0.8567                 | 7.1757  | 0.1025          | 9.0092  |
| <b>Elastic Net</b>    | 0.8960            | 6.6632 | 0.0952          | 8.2187  | 0.8548                 | 7.1816  | 0.1026          | 9.0706  |
| <b>Huber</b>          | 0.8938            | 6.7060 | 0.0958          | 8.2835  | 0.8455                 | 7.4663  | 0.1067          | 9.3166  |
| <b>Bayesian Ridge</b> | 0.8927            | 6.7691 | 0.0967          | 8.3097  | 0.8445                 | 7.4698  | 0.1067          | 9.3459  |
| <b>RVR</b>            | 0.8824            | 6.9355 | 0.0991          | 8.6688  | 0.8378                 | 7.5311  | 0.1076          | 9.5367  |
| <b>PAR</b>            | 0.8877            | 6.9834 | 0.0998          | 8.6292  | 0.8395                 | 7.5762  | 0.1082          | 9.4878  |
| <b>Ridge</b>          | 0.8906            | 6.8230 | 0.0975          | 8.4733  | 0.8432                 | 7.5865  | 0.1084          | 9.3765  |
| <b>OMP</b>            | 0.8827            | 7.0357 | 0.1005          | 8.7920  | 0.8437                 | 7.6179  | 0.1088          | 9.3874  |
| <b>GPR</b>            | 0.8839            | 7.0175 | 0.1003          | 8.8069  | 0.8377                 | 7.7190  | 0.1103          | 9.5526  |
| <b>LR</b>             | 0.8826            | 7.0582 | 0.1008          | 8.8650  | 0.8366                 | 7.7432  | 0.1106          | 9.5853  |
| <b>MLP</b>            | 0.8831            | 7.0570 | 0.1008          | 8.8420  | 0.8364                 | 7.7450  | 0.1106          | 9.5878  |
| <b>SVR</b>            | 0.8887            | 6.8523 | 0.0979          | 8.4799  | 0.8309                 | 7.7551  | 0.1108          | 9.7319  |
| <b>RANSAC</b>         | 0.8789            | 7.2202 | 0.1031          | 9.0337  | 0.8282                 | 7.8652  | 0.1124          | 9.8203  |
| <b>Theil-Sen</b>      | 0.8791            | 7.1771 | 0.1025          | 9.0597  | 0.8366                 | 7.8698  | 0.1124          | 9.6104  |
| <b>GBM</b>            | 0.8681            | 7.3435 | 0.1049          | 9.1562  | 0.8368                 | 7.9222  | 0.1132          | 9.6339  |
| <b>CatBoost</b>       | 0.8667            | 7.3767 | 0.1054          | 9.2270  | 0.8230                 | 8.1285  | 0.1161          | 10.0429 |
| <b>XGBoost</b>        | 0.8552            | 7.5686 | 0.1081          | 9.5496  | 0.8167                 | 8.3920  | 0.1199          | 10.2965 |
| <b>LightGBM</b>       | 0.8646            | 7.1822 | 0.1026          | 9.2233  | 0.8040                 | 8.4686  | 0.1210          | 10.4704 |
| <b>Kernel Ridge</b>   | 0.876             | 7.2091 | 0.1030          | 8.9549  | 0.7022                 | 8.6938  | 0.1242          | 14.1861 |
| <b>Extra Trees</b>    | 0.8565            | 7.7800 | 0.1111          | 9.6758  | 0.8050                 | 8.8377  | 0.1263          | 10.4629 |
| <b>Random Forest</b>  | 0.8410            | 8.0043 | 0.1143          | 10.0129 | 0.7955                 | 8.9883  | 0.1284          | 10.6854 |
| <b>AdaBoost</b>       | 0.8405            | 8.0458 | 0.1149          | 10.0575 | 0.7725                 | 9.4055  | 0.1344          | 11.1983 |
| <b>LAR</b>            | 0.8378            | 8.3740 | 0.1196          | 10.3008 | 0.7577                 | 9.5307  | 0.1362          | 11.4450 |
| <b>kNN</b>            | 0.8234            | 8.7403 | 0.1249          | 10.7922 | 0.7709                 | 9.6734  | 0.1382          | 11.5064 |
| <b>Decision Tree</b>  | 0.7259            | 9.7473 | 0.1392          | 12.7333 | 0.6430                 | 10.5017 | 0.1500          | 13.9457 |

**Supplementary Table S9.** The algorithm performance based on the structural features from the IXI individuals entered in the model for model performance in the training data (n = 453) and prediction performance in the hold-out test data (n = 114).

| Algorithm      | Model performance |        |              |         | Prediction performance |        |              |         |
|----------------|-------------------|--------|--------------|---------|------------------------|--------|--------------|---------|
|                | R                 | MAE    | Weighted MAE | RMSE    | R                      | MAE    | Weighted MAE | RMSE    |
| ARD            | 0.8268            | 7.4790 | 0.1133       | 9.3023  | 0.7998                 | 8.0453 | 0.1219       | 9.7586  |
| Lasso LAR      | 0.8290            | 7.4126 | 0.1123       | 9.2080  | 0.7981                 | 8.0473 | 0.1219       | 9.8065  |
| Lasso          | 0.8290            | 7.4129 | 0.1123       | 9.2085  | 0.7981                 | 8.0477 | 0.1219       | 9.8067  |
| MLP            | 0.7939            | 8.1039 | 0.1228       | 10.364  | 0.7779                 | 8.0675 | 0.1222       | 10.3325 |
| PAR            | 0.8171            | 7.8135 | 0.1184       | 9.7111  | 0.7902                 | 8.2368 | 0.1248       | 9.9684  |
| XGBoost        | 0.8160            | 7.7096 | 0.1168       | 9.5314  | 0.7918                 | 8.2664 | 0.1252       | 9.9961  |
| Bayesian Ridge | 0.8308            | 7.4376 | 0.1127       | 9.2152  | 0.7945                 | 8.2785 | 0.1254       | 9.8881  |
| GBM            | 0.8161            | 7.5873 | 0.1150       | 9.5333  | 0.7818                 | 8.3159 | 0.1260       | 10.2182 |
| Elastic Net    | 0.8343            | 7.3865 | 0.1119       | 9.1223  | 0.7947                 | 8.3217 | 0.1261       | 9.9199  |
| SVR            | 0.8303            | 7.5350 | 0.1142       | 9.2671  | 0.7904                 | 8.3845 | 0.1270       | 9.9973  |
| Ridge          | 0.8329            | 7.4285 | 0.1126       | 9.1804  | 0.7934                 | 8.3912 | 0.1271       | 9.9448  |
| GPR            | 0.7866            | 8.4452 | 0.1280       | 10.5033 | 0.7719                 | 8.3925 | 0.1272       | 10.4667 |
| LAR            | 0.8132            | 7.7176 | 0.1169       | 9.6041  | 0.7837                 | 8.4347 | 0.1278       | 10.1105 |
| LR             | 0.7832            | 8.5274 | 0.1292       | 10.6074 | 0.7692                 | 8.4450 | 0.1280       | 10.5417 |
| Huber          | 0.7966            | 8.1947 | 0.1242       | 10.2374 | 0.7704                 | 8.5157 | 0.1290       | 10.5225 |
| CatBoost       | 0.8299            | 7.6574 | 0.1160       | 9.2785  | 0.7918                 | 8.6085 | 0.1304       | 10.2038 |
| Theil-Sen      | 0.7862            | 8.4097 | 0.1274       | 10.5505 | 0.7534                 | 8.6277 | 0.1307       | 10.9854 |
| RVR            | 0.8322            | 7.4849 | 0.1134       | 9.2289  | 0.7766                 | 8.6291 | 0.1307       | 10.2432 |
| OMP            | 0.8029            | 7.9480 | 0.1204       | 9.8892  | 0.7603                 | 8.8267 | 0.1337       | 10.5987 |
| LightGBM       | 0.8196            | 7.6084 | 0.1153       | 9.492   | 0.7475                 | 8.8588 | 0.1342       | 10.7975 |
| Extra Trees    | 0.8257            | 7.7683 | 0.1177       | 9.5285  | 0.7876                 | 8.9449 | 0.1355       | 10.4976 |
| Random Forest  | 0.8118            | 7.9223 | 0.1200       | 9.7984  | 0.7679                 | 8.9912 | 0.1362       | 10.7648 |
| Kernel Ridge   | 0.8316            | 7.5138 | 0.1138       | 9.1818  | 0.7230                 | 9.0415 | 0.1370       | 11.2986 |
| RANSAC         | 0.7772            | 8.655  | 0.1311       | 10.931  | 0.7384                 | 9.1059 | 0.1380       | 11.4204 |
| AdaBoost       | 0.8211            | 7.7603 | 0.1176       | 9.4691  | 0.7402                 | 9.2366 | 0.1399       | 11.0331 |
| kNN            | 0.7769            | 8.3113 | 0.1259       | 10.4212 | 0.7027                 | 9.2521 | 0.1402       | 11.7032 |
| Decision Tree  | 0.7066            | 9.3118 | 0.1411       | 12.2431 | 0.6315                 | 9.8640 | 0.1495       | 13.2255 |

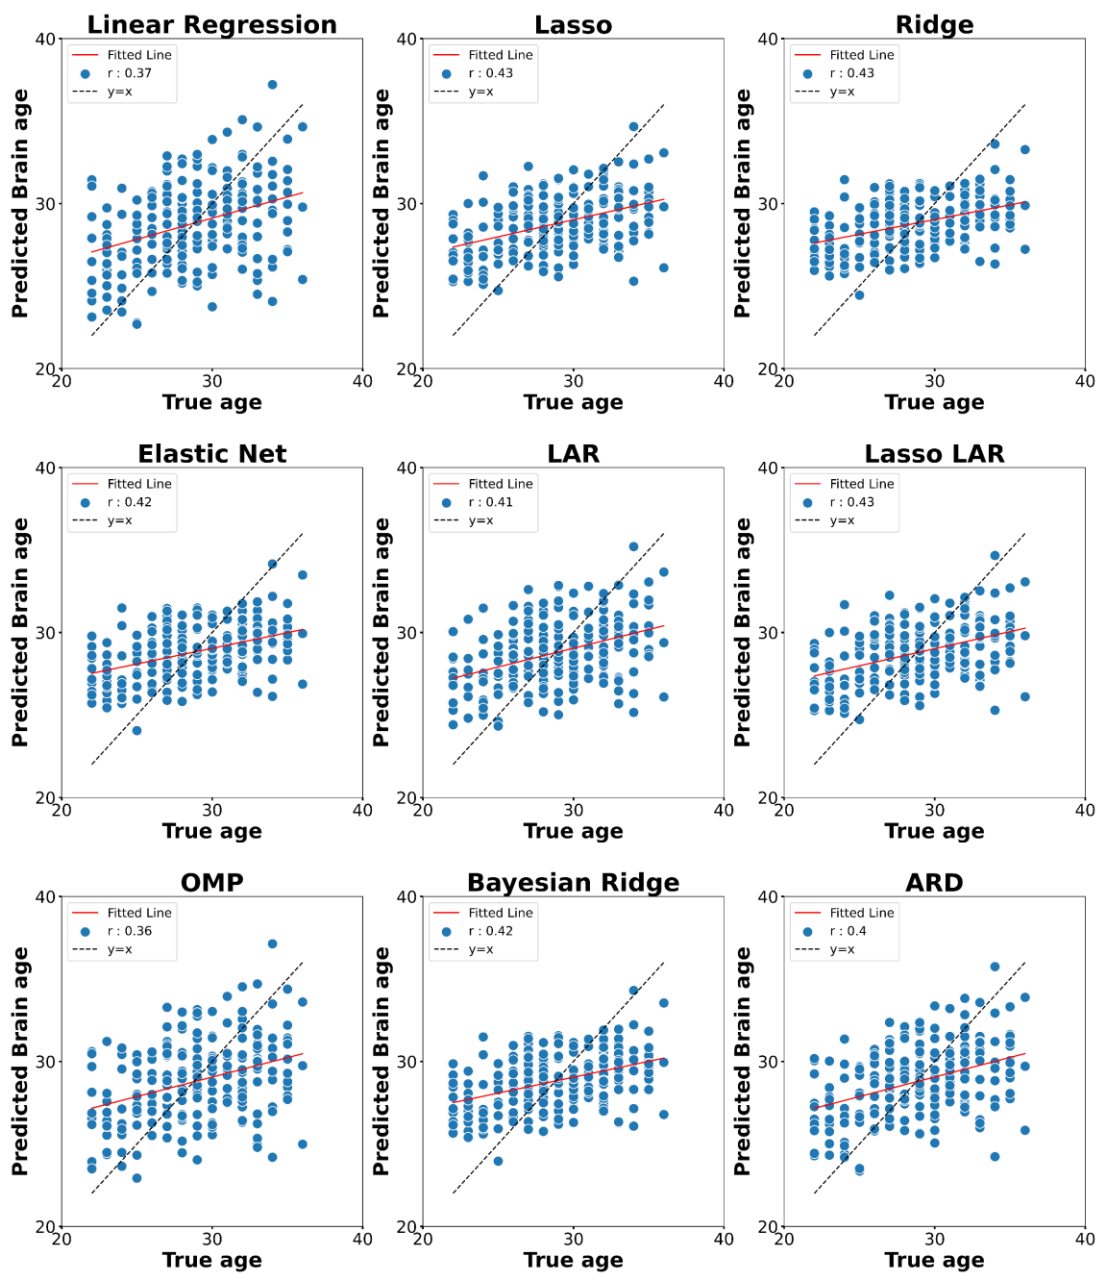

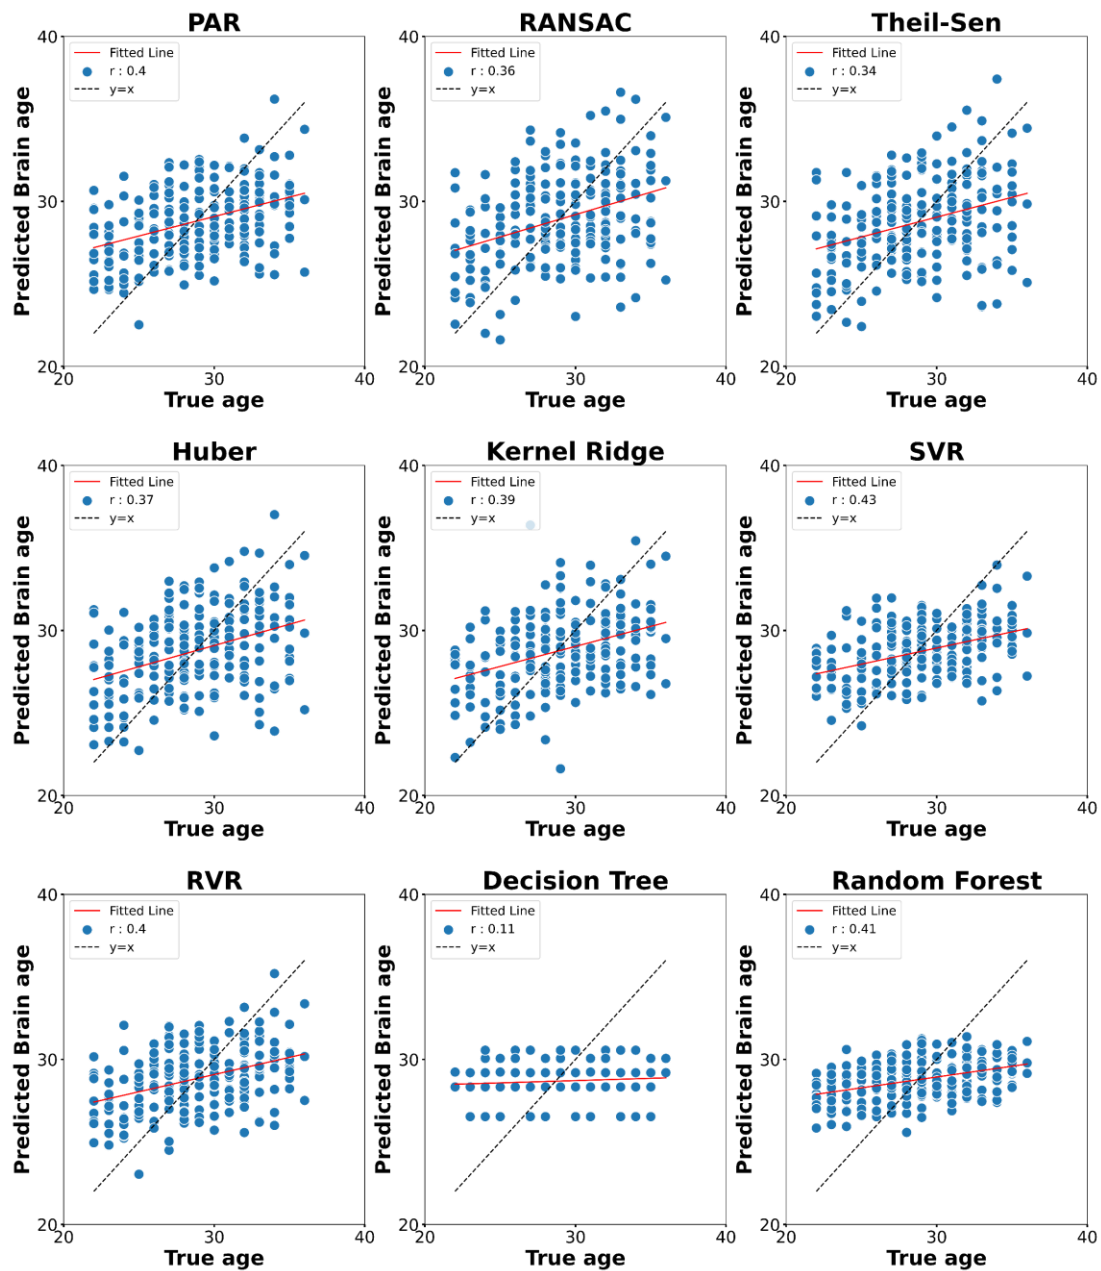

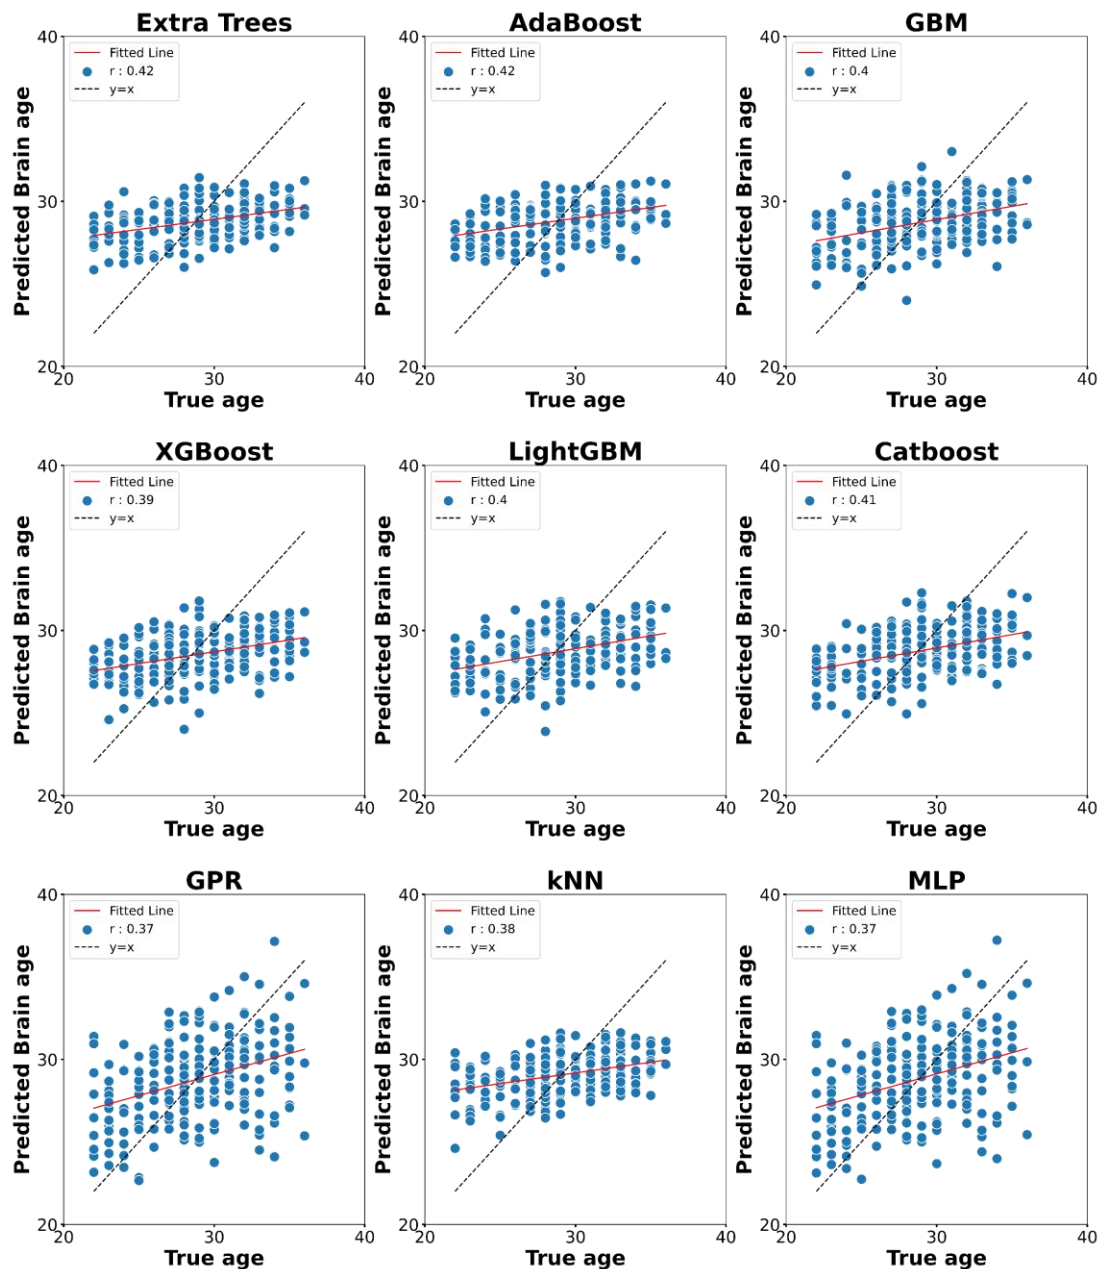

**Supplementary Figure S2.** Scatter plots showing pairwise correlations between chronological age and predicted brain age across 27 algorithms for the HCP cohort. Pearson correlations are shown for each association. Lasso = Least Absolute Shrinkage and Selection Operator Regression; Lasso LAR = Lasso Least Angle Regression; SVR = Support Vector Regression; LAR= Least Angle Regression; Elastic Net = Elastic-Net Regression; Bayesian Ridge = Bayesian Ridge Regression; Ridge = Ridge Regression; ARD = Automatic Relevance

Determination; Random Forest = Random Forest Regression; PAR = Passive Aggressive Regression; CatBoost = Category Boosting Regression; RVR = Relevance Vector Regression; LightGBM= Light Gradient Boosting Machine; GBM = Gradient Boosting Machine; kNN = K-Nearest Neighbors; AdaBoost = Adaptive Boosting Regression; Extra Trees = Extra Trees Regression; XGBoost = Extreme Gradient Boosting; Kernel Ridge = Kernel Ridge Regression; GPR = Gaussian Processes Regression; MLP = Multi-layer Perceptron Regression; OMP = Orthogonal Matching Pursuit; Linear Regression = Linear Regression; Huber = Huber Regression; Theil-Sen = Theil-Sen Regression; RANSAC = Random Sample Consensus; Decision Tree = Decision Tree Regression.



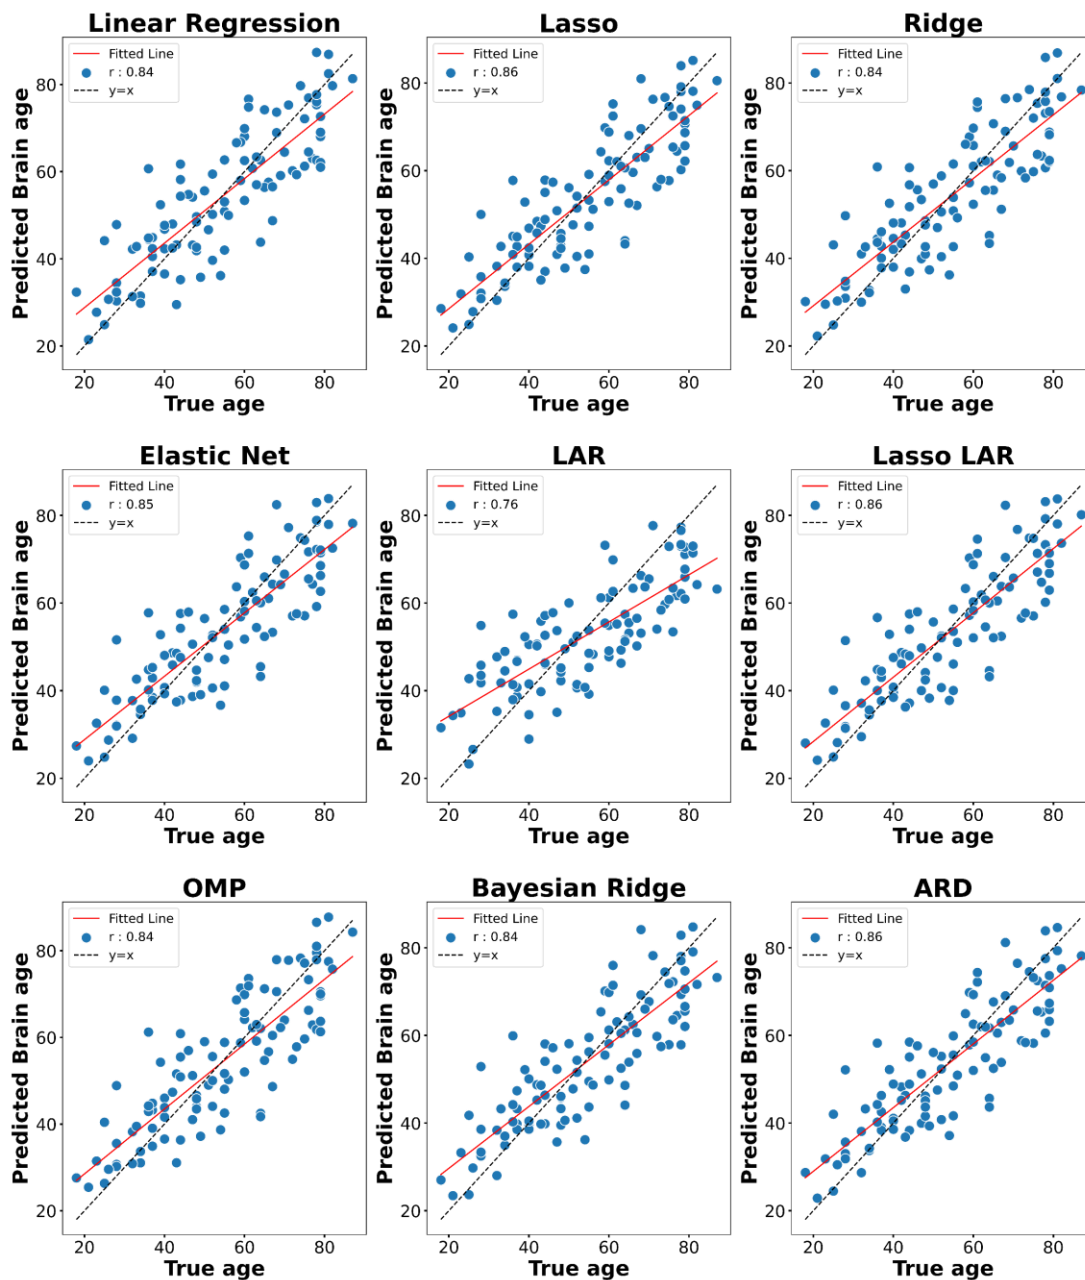

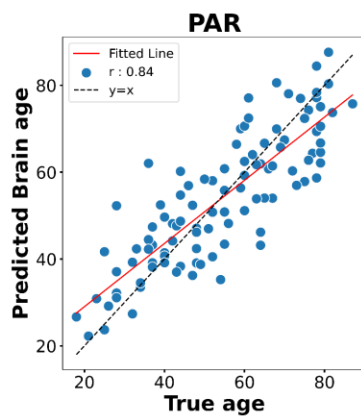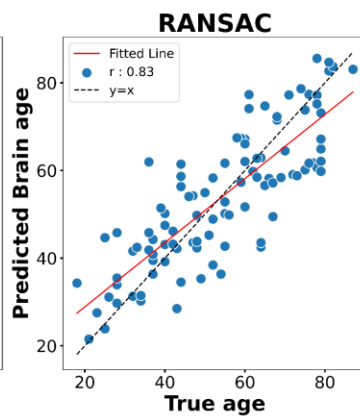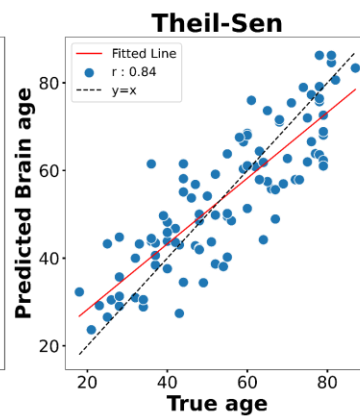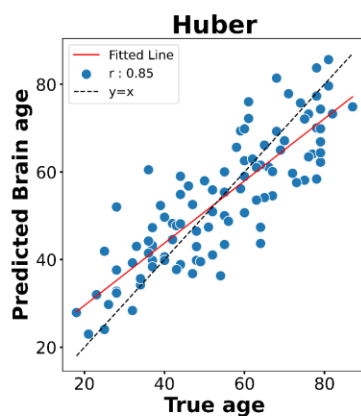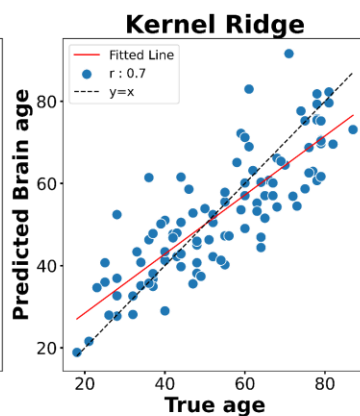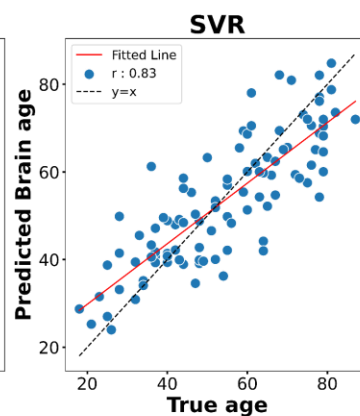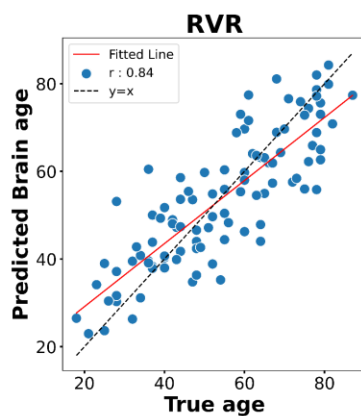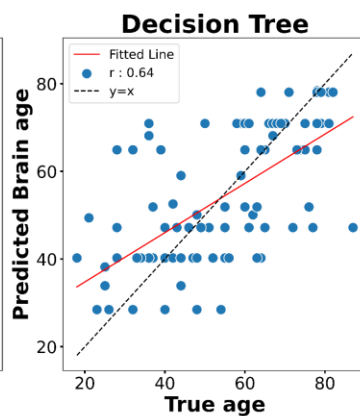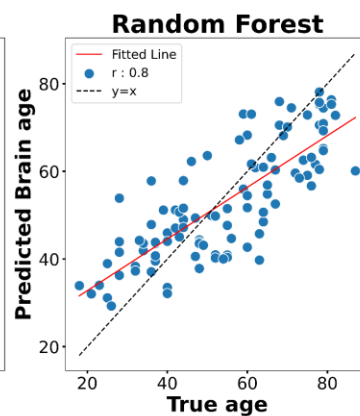

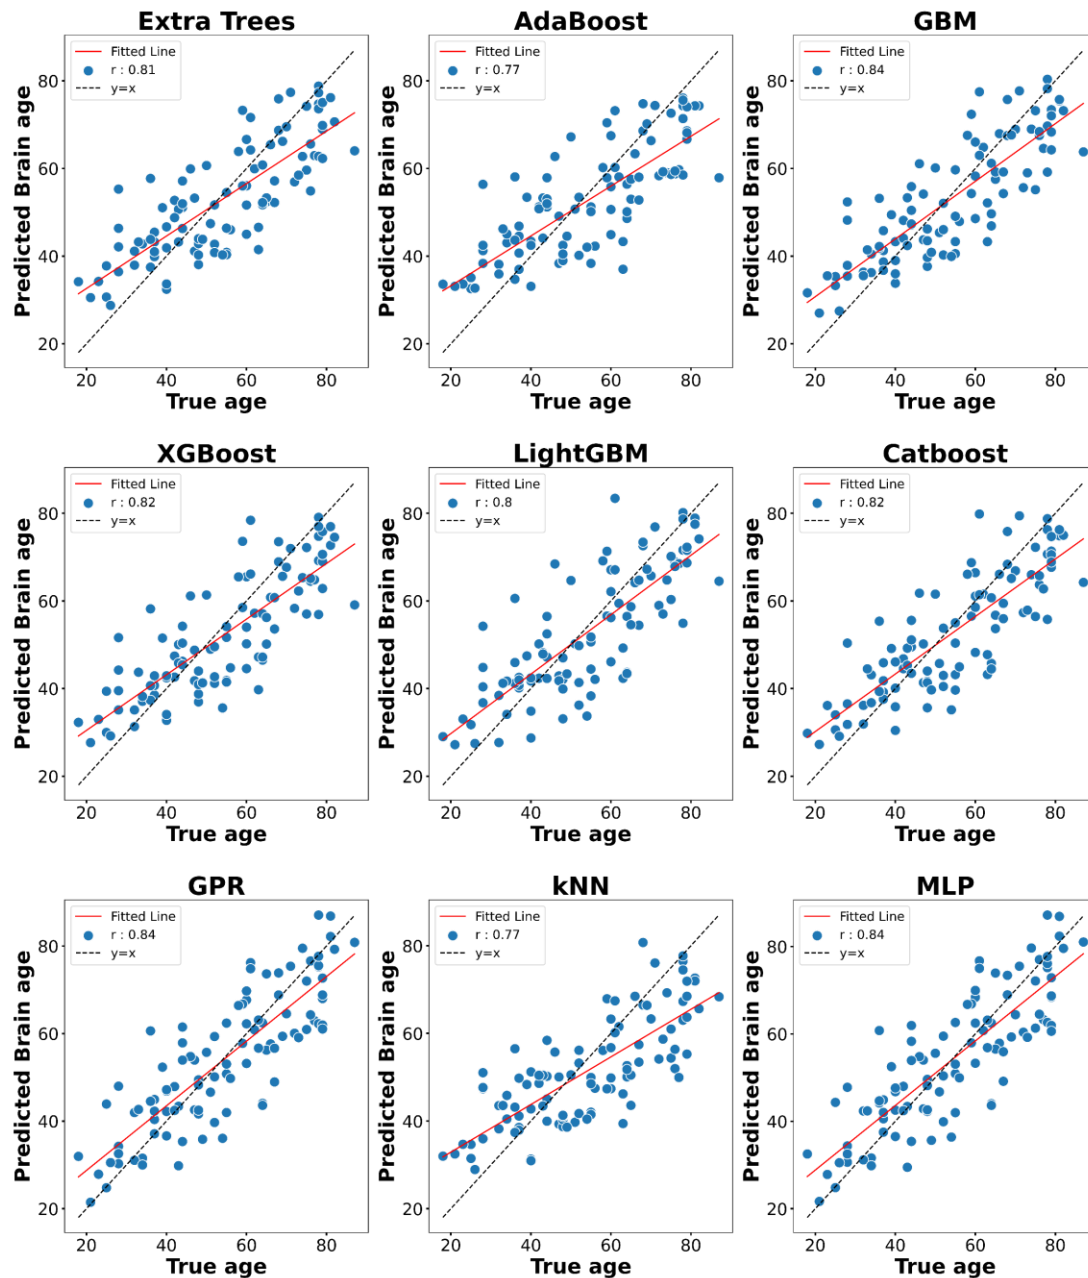

**Supplementary Figure S3.** Scatter plots showing pairwise correlations between chronological age and predicted brain age across 27 algorithms for the Cam-CAN cohort. Pearson correlations are shown for each association. Lasso = Least Absolute Shrinkage and Selection Operator Regression; Lasso LAR = Lasso Least Angle Regression; SVR = Support Vector Regression; LAR= Least Angle Regression; Elastic Net = Elastic-Net Regression; Bayesian Ridge = Bayesian Ridge Regression; Ridge = Ridge Regression; ARD = Automatic

Relevance Determination; Random Forest = Random Forest Regression; PAR = Passive Aggressive Regression; CatBoost = Category Boosting Regression; RVR = Relevance Vector Regression; LightGBM= Light Gradient Boosting Machine; GBM = Gradient Boosting Machine; kNN = K-Nearest Neighbors; AdaBoost = Adaptive Boosting Regression; Extra Trees = Extra Trees Regression; XGBoost = Extreme Gradient Boosting; Kernel Ridge = Kernel Ridge Regression; GPR = Gaussian Processes Regression; MLP = Multi-layer Perceptron Regression; OMP = Orthogonal Matching Pursuit; Linear Regression = Linear Regression; Huber = Huber Regression; Theil-Sen = Theil-Sen Regression; RANSAC = Random Sample Consensus; Decision Tree = Decision Tree Regression.

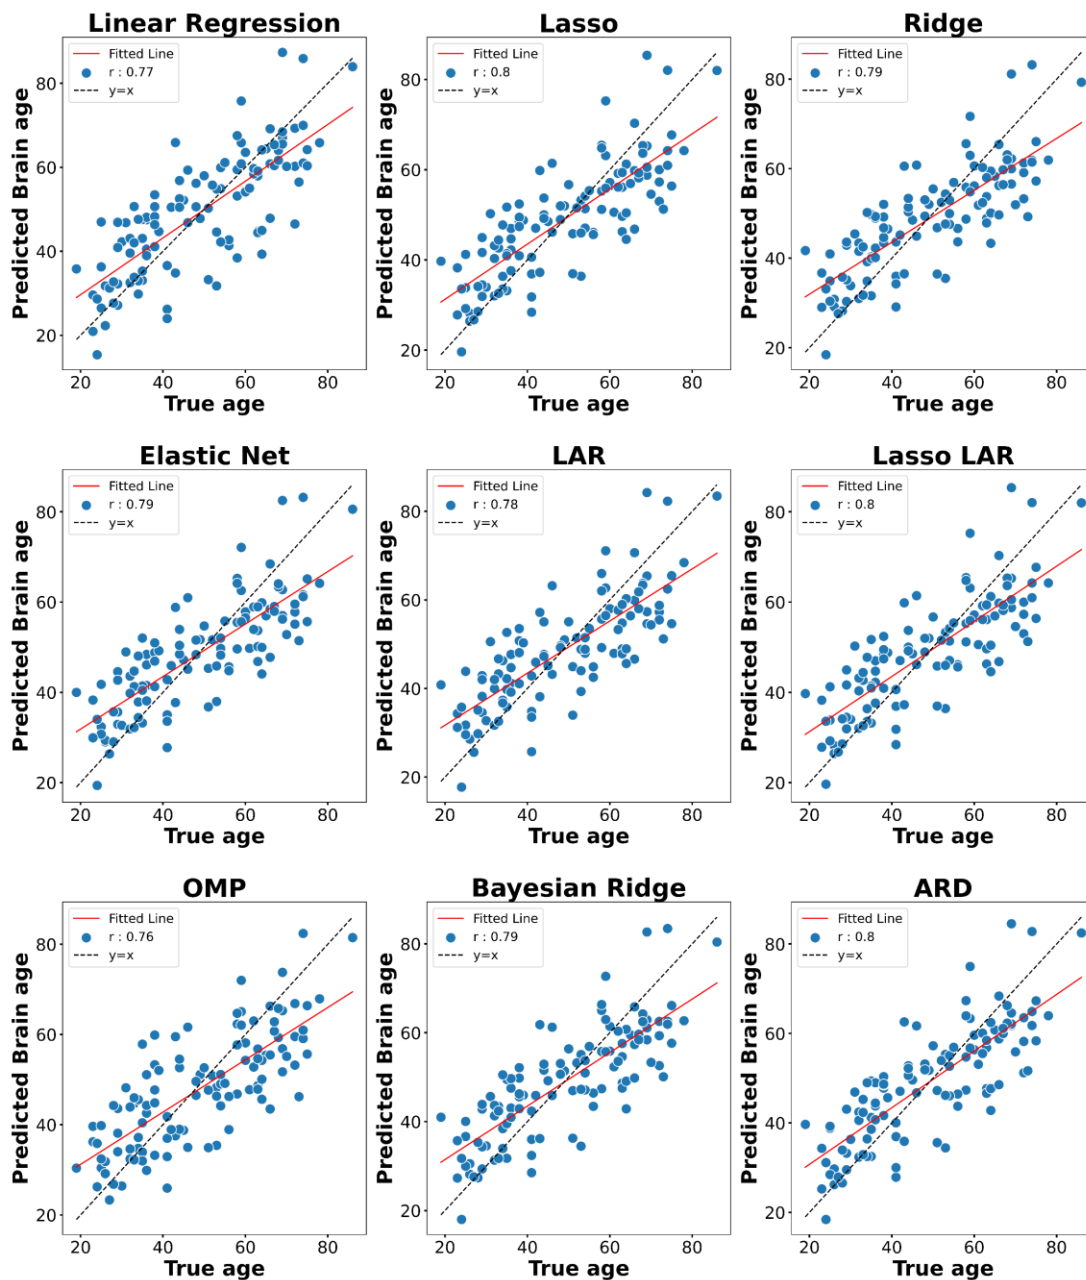

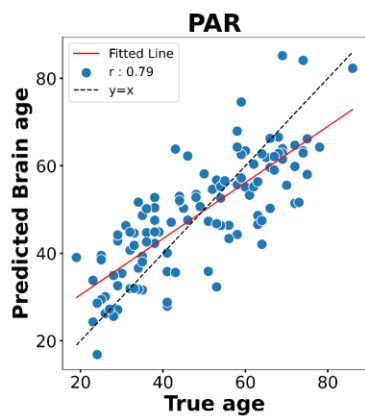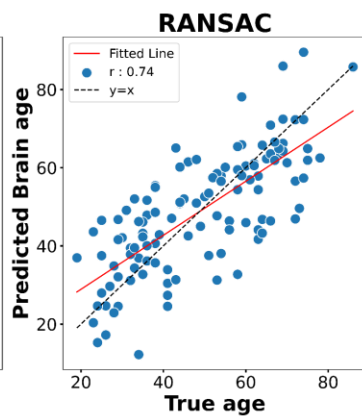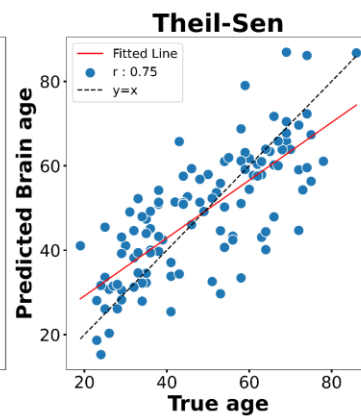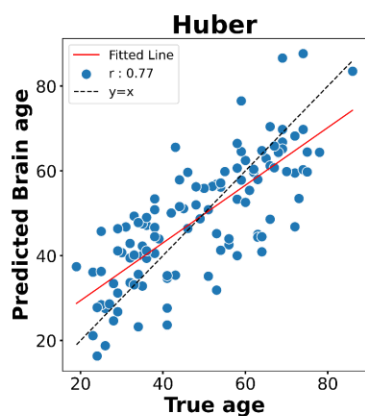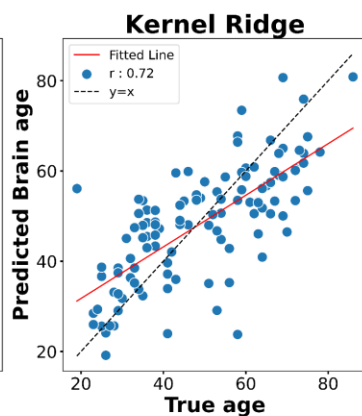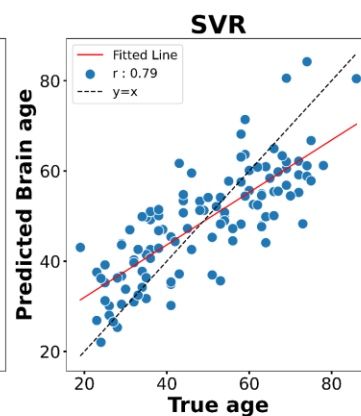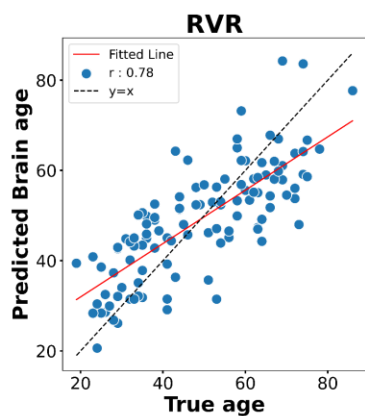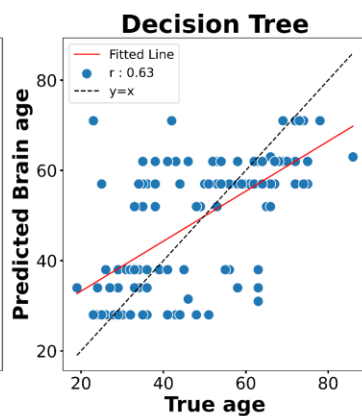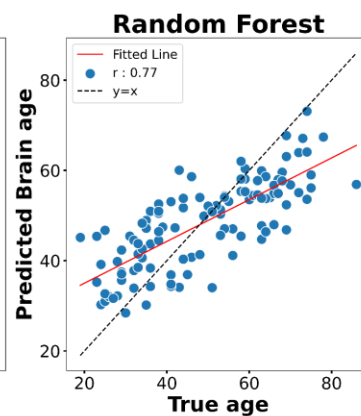

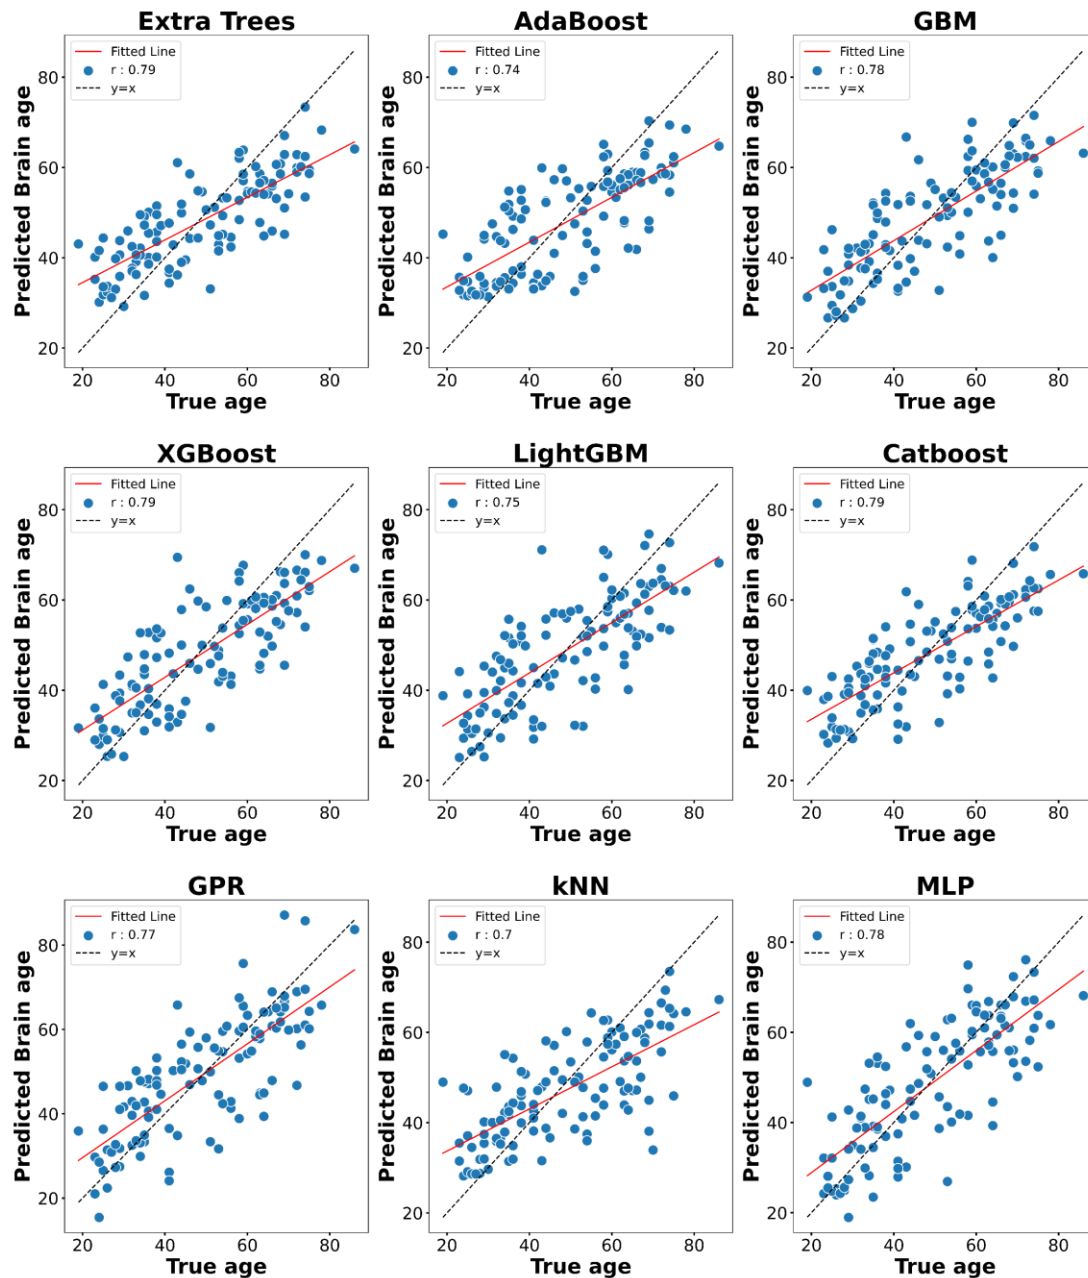

**Supplementary Figure S4.** Scatter plots showing pairwise correlations between chronological age and predicted brain age across 27 algorithms for the IXI cohort. Pearson correlations are shown for each association. Lasso = Least Absolute Shrinkage and Selection Operator Regression; Lasso LAR = Lasso Least Angle Regression; SVR = Support Vector Regression; LAR= Least Angle Regression; Elastic Net = Elastic-Net Regression; Bayesian Ridge = Bayesian Ridge Regression; Ridge = Ridge Regression; ARD = Automatic Relevance

Determination; Random Forest = Random Forest Regression; PAR = Passive Aggressive Regression; CatBoost = Category Boosting Regression; RVR = Relevance Vector Regression; LightGBM= Light Gradient Boosting Machine; GBM = Gradient Boosting Regression; kNN = K-Nearest Neighbors; AdaBoost = Adaptive Boosting Regression; Extra Trees = Extra Trees Regression; XGBoost = Extreme Gradient Boosting; Kernel Ridge = Kernel Ridge Regression; GPR = Gaussian Processes Regression; MLP = Multi-layer Perceptron Regression; OMP = Orthogonal Matching Pursuit; Linear Regression = Linear Regression; Huber = Huber Regression; Theil-Sen = Theil-Sen Regression; RANSAC = Random Sample Consensus; Decision Tree = Decision Tree Regression.



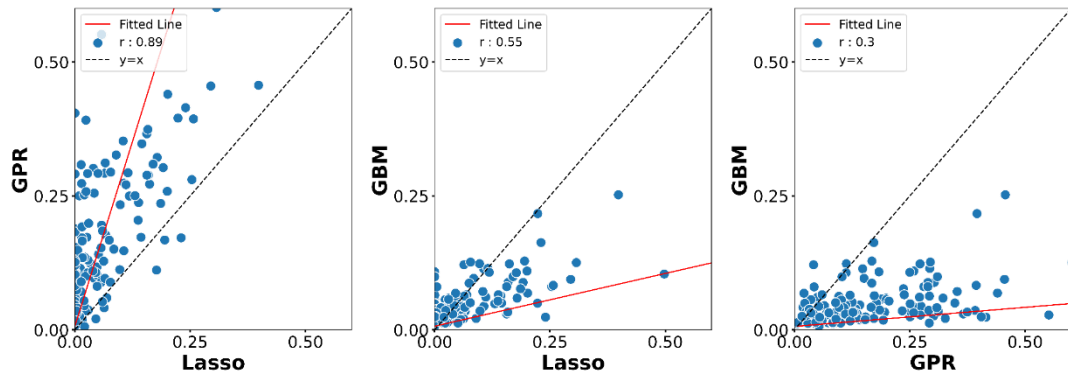

(a)

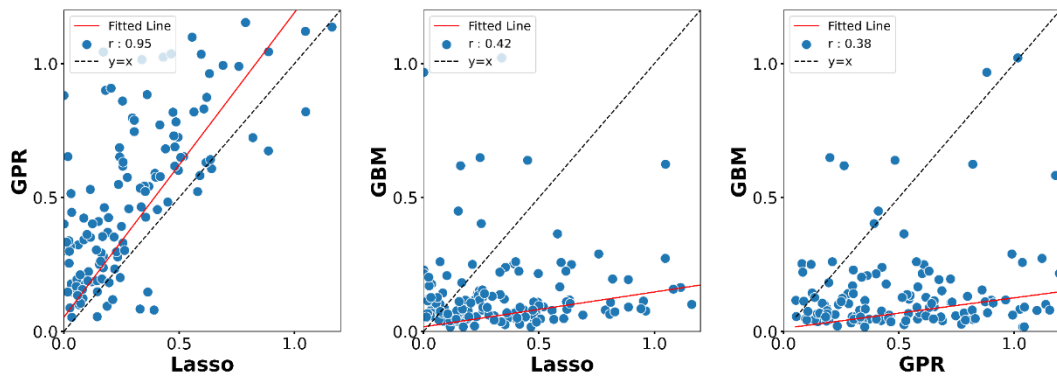

(b)

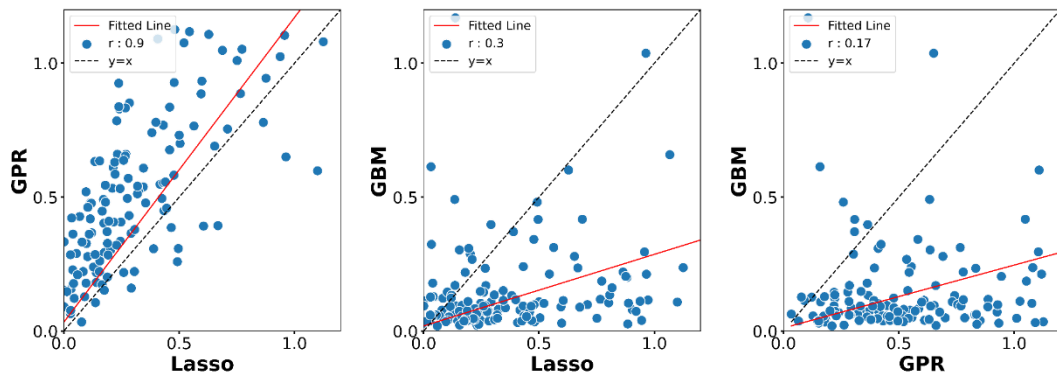

(c)

**Supplementary Figure S5.** Scatter plots showing correlations of mean absolute SHAP values (feature importance) between models (Lasso, GPR, and GBM) for the (a) HCP, (b) Cam-CAN, and IXI cohorts. Pearson correlations are shown for each association. Lasso = Least Absolute Shrinkage and Selection Operator Regression; GPR = Gaussian Processes Regression; GBM = Gradient Boosting Machine.

### **The effects of feature selection on regression performance**

Feature selection was performed based on the SHAP values (i.e., feature importance) to select an optimal subset of features. We trained each model (i.e., Lasso, Gaussian process regression, and gradient boosting machine) with the top  $n$  (from 1 to 153 with a step of 1) feature(s) in the training set and estimated the regression performance on the test with the trained model. For each dataset, we present the results below for the regression performance using top  $n$  (from 1 to 153 with a step size of 1) features(s) by each algorithm. We report the MAE values averaged across all cross-validation results.

In the HCP, using the top 38 features, an average MAE was 2.71 in the test set, lower than 2.75, corresponding to the lowest MAE obtained by all 153 features with the Lasso. Gaussian process regression with the top 67 features achieved an average MAE of 2.81 in the test set, which is lower than 2.94, equal to the lowest MAE obtained by all 153 features. Gradient boosting machine with the top 52 features achieved an average MAE value of 2.75 in the test set, lower than 2.84, corresponding to the lowest MAE obtained by all 153 features. In the Cam-CAN, using the top 121 features, an average MAE was 7.11 in the test set, lower than 7.17, corresponding to the lowest MAE obtained by all 153 features with the Lasso. Gaussian process regression with the top 27 features achieved an average MAE of 7.18 in the test set, which is lower than 7.71, equal to the lowest MAE obtained by all 153 features. Gradient boosting machine with the top 75 features achieved an average MAE value of 7.37 in the test set, lower than 7.92 corresponding to the lowest MAE obtained by all 153 features. In the IXI, using the top 78 features, an average MAE was 8.04 in the test set, equal to the lowest MAE obtained by all 153 features with the Lasso. Gaussian process regression with the top 92 features achieved an average MAE of 8.13 in the test set, which is lower than 8.39, equal to the lowest MAE obtained by all 153 features. Gradient boosting machine with the top 31 features achieved an average MAE value of 7.97 in the test set, lower than 8.31, corresponding to the lowest MAE obtained by all 153 features.

We selected the most important features based on the SHAP value and eliminated features with low SHAP values to select an optimal subset of features. Then we investigated the effects of feature selections on algorithm performance. Our results demonstrate that feature selection improves the performance of each algorithm in brain age prediction

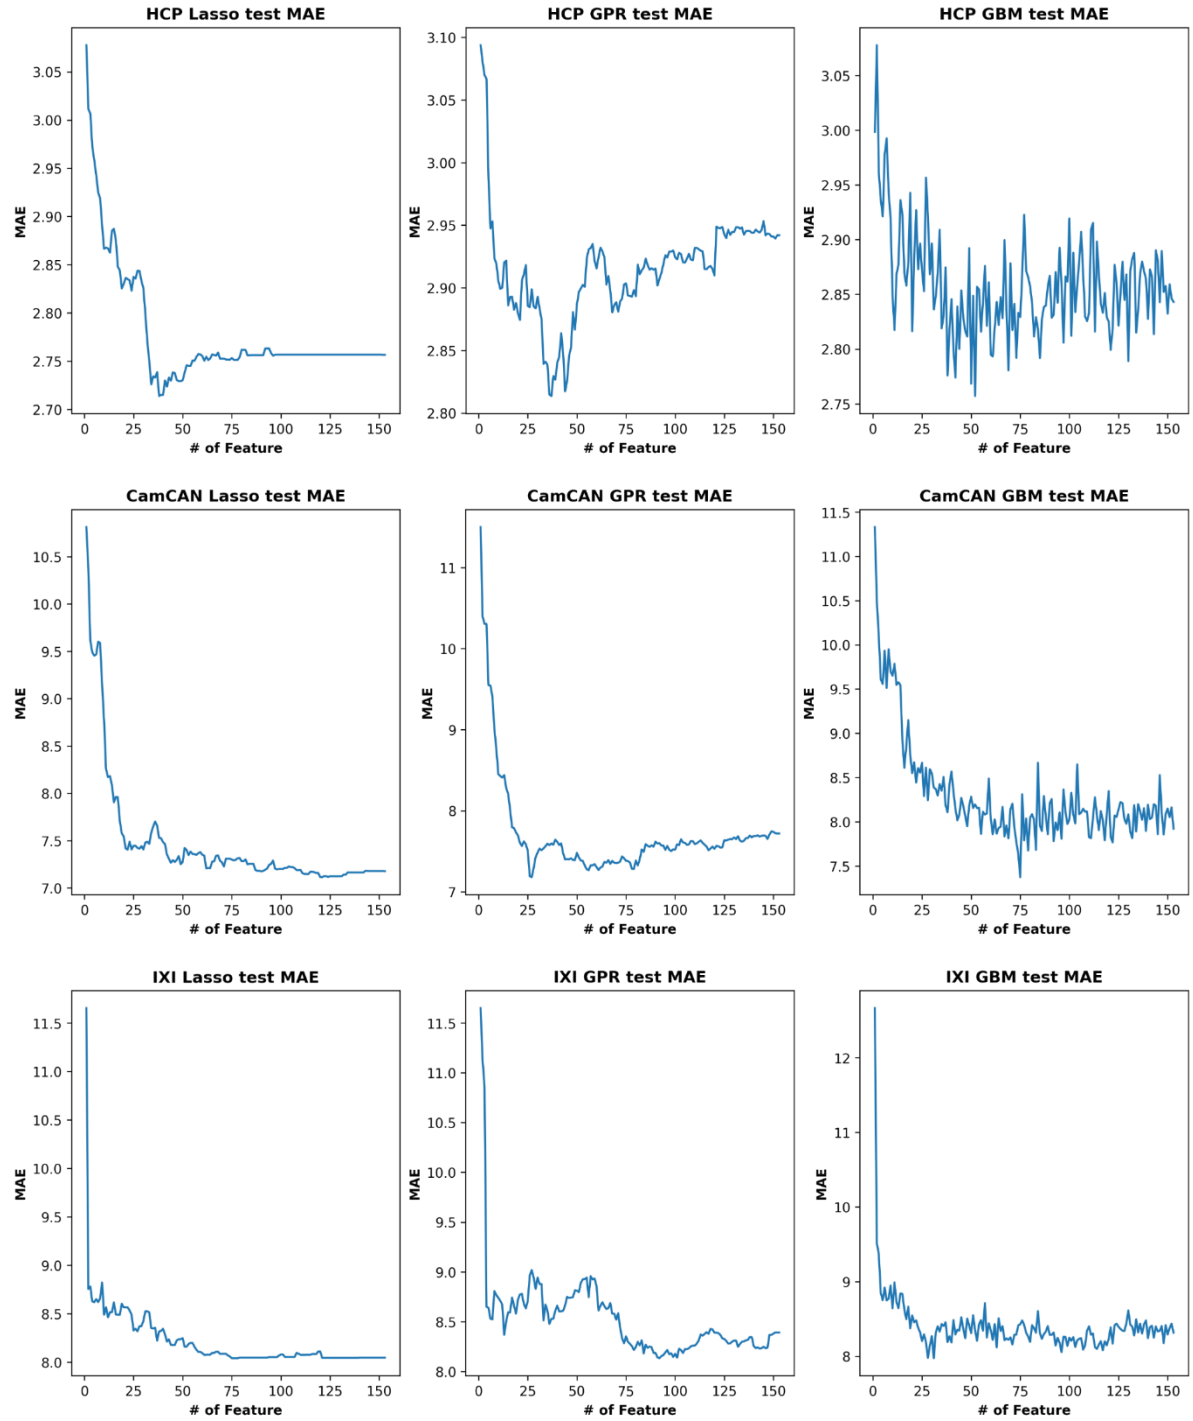

**Supplementary Figure S6.** Average accuracies (mean absolute error, MAE) of different feature dimensionality in the test sets for each algorithm (Lasso, Gaussian process regression, and gradient boosting machine) in the HCP (top), Cam-CAN (middle), and IXI (bottom).
